# Supplementary material
Source: PubMed Central journal article supplement (PMC5137707)
Supplement: pnas.1608041113.sapp.pdf [file pnas.1608041113.sapp.pdf]

Topic Modeling for Untargeted Substructure Exploration in Metabolomics  
van der Hooft et al.

## Supporting Appendix

# TABLE OF CONTENTS

|                                                                                                                                    |           |
|------------------------------------------------------------------------------------------------------------------------------------|-----------|
| <b>TABLE OF CONTENTS .....</b>                                                                                                     | <b>2</b>  |
| <b>Section S1. MS2LDA workflow .....</b>                                                                                           | <b>4</b>  |
| <b>S1.1 Data Conversion Stage.....</b>                                                                                             | <b>4</b>  |
| Special feature extraction pipeline for GNPS and MassBank.....                                                                     | 6         |
| <b>S1.2 Mass2Motif Discovery Stage .....</b>                                                                                       | <b>6</b>  |
| Gibbs sampling.....                                                                                                                | 7         |
| Variational inference .....                                                                                                        | 7         |
| Cross-validation .....                                                                                                             | 7         |
| Incorporating previously defined Mass2Motifs .....                                                                                 | 8         |
| Running times.....                                                                                                                 | 8         |
| <b>S1.3 Candidate Elemental Formula Assignment.....</b>                                                                            | <b>8</b>  |
| <b>S1.4 Visualisation Using the MS2LDAvis Module .....</b>                                                                         | <b>9</b>  |
| <b>Section S2. Supporting Results.....</b>                                                                                         | <b>11</b> |
| <b>S2.1 Mass2Motif structural characterizations .....</b>                                                                          | <b>11</b> |
| <b>S2.2 Feature Extraction in the MS2LDA Workflow .....</b>                                                                        | <b>35</b> |
| <b>S2.3 Mass2Motifs and MS1 Peaks Statistics .....</b>                                                                             | <b>36</b> |
| <b>S2.4 Metabolite Annotations Using Mass2Motif Membership and Spectral Matching to the Nist_msms and MassBank Databases .....</b> | <b>36</b> |
| <b>S2.5 Co-occurrences of Fragments and Losses in Matched Mass2Motifs from Different Samples .....</b>                             | <b>44</b> |
| <b>S2.6 Similar yet Different Aromatic Substructures of Phenylethene, Ethylphenol, and Phenylethylenamine.....</b>                 | <b>45</b> |
| <b>S2.7 Structurally Annotated Mass2Motifs Can Explain Matched Standards.....</b>                                                  | <b>47</b> |
| <b>S2.8 GNPS and Massbank Results.....</b>                                                                                         | <b>48</b> |
| Validation of beer-characterized Mass2Motifs in MassBank and GNPS data sets.....                                                   | 48        |
| Assessment of number of validated Mass2Motifs per MassBank and GNPS fragmentation spectrum.....                                    | 50        |
| MS2LDA finds not previously characterized Mass2Motifs in MassBank and GNPS data sets .....                                         | 51        |
| MS2LDA applied to urine data.....                                                                                                  | 51        |
| <b>S2.9 Molecular Networking of Beer Fragmentation Files .....</b>                                                                 | <b>52</b> |
| MS2LDA and Molecular Networking Comparison.....                                                                                    | 53        |
| <b>S2.10 Perplexity Comparison of MS2LDA and Multinomial Mixture Model.....</b>                                                    | <b>54</b> |
| <b>S2.11 Differential Analysis of Mass2Motifs .....</b>                                                                            | <b>54</b> |
| <b>S2.12 MS2LDA Uses High-Resolution Mass Spectrometry Information in the MS2 Domain</b>                                           | <b>58</b> |
| <b>S2.13 Spectral Matching of Mass2Motifs Using Their Reconstructed Mass Spectra.....</b>                                          | <b>59</b> |
| <b>Section S3. Beer Samples information.....</b>                                                                                   | <b>63</b> |
| <b>S3.1 General information .....</b>                                                                                              | <b>63</b> |
| <b>S3.2 Ingredients.....</b>                                                                                                       | <b>63</b> |
| <b>S3.3 Gravity, Alcohol Content and Color .....</b>                                                                               | <b>63</b> |
| <b>S3.4 Mash Profile .....</b>                                                                                                     | <b>64</b> |
| <b>S3.5 Mash Steps.....</b>                                                                                                        | <b>64</b> |
| <b>S3.6 Carbonation and Storage .....</b>                                                                                          | <b>64</b> |
| <b>Section S4. Data acquisition workflow .....</b>                                                                                 | <b>65</b> |

|                                                                               |           |
|-------------------------------------------------------------------------------|-----------|
| <b>Section S5. MS and MS/MS settings.....</b>                                 | <b>66</b> |
| <b>S5.1 Positive Negative Ionization Combined Fragmentation Mode.....</b>     | <b>66</b> |
| <b>S5.2 Positive or Negative Ionization Separate Fragmentation modes.....</b> | <b>66</b> |
| <b>References .....</b>                                                       | <b>67</b> |

## SECTION S1. MS2LDA WORKFLOW

This section described the entire MS2LDA workflow developed within this study.

The entire MS2LDA workflow is summarized in Figure S-1.

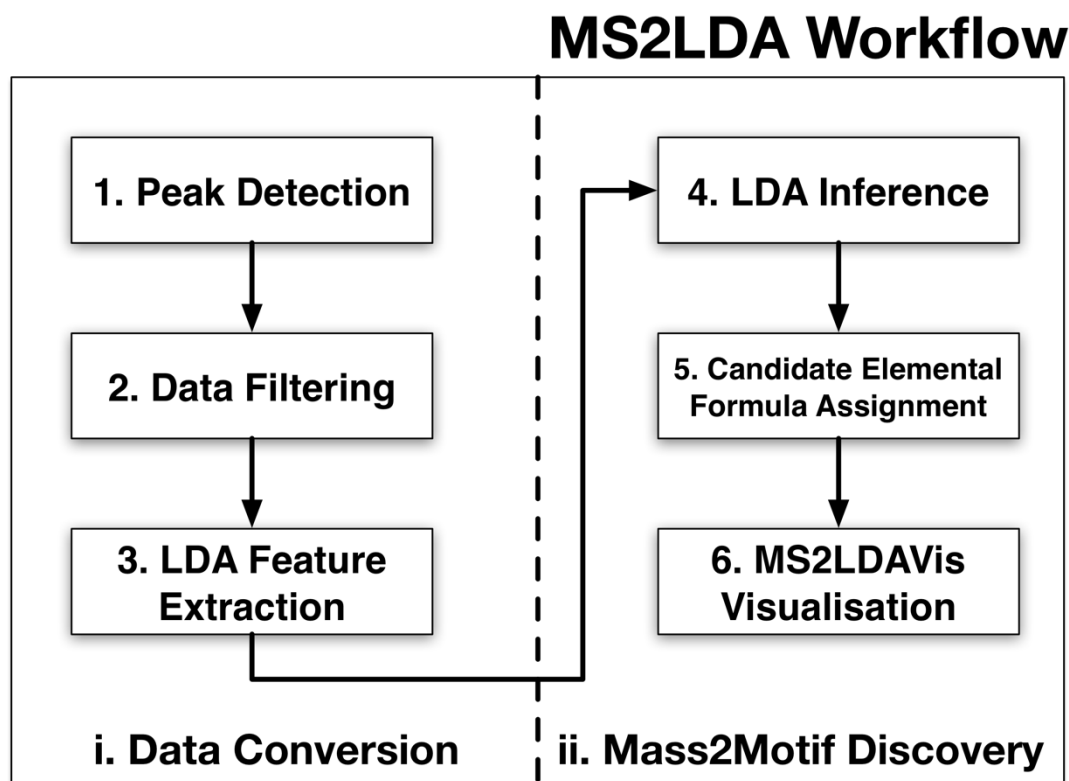

Figure S-1. The MS2LDA workflow.

### S1.1 Data Conversion Stage

Data conversion is an essential part of the MS2LDA workflow, since the acquired fragmentation data cannot readily be used for the purpose of mass fragmental pattern searching. Our workflow (illustrated in Figure S-1) accepts as input the combination of a single full-scan file for the MS1 peaks and a separate fragmentation file for the MS2 peaks (alternative strategies for peak detection and MS1-MS2 correspondence establishment that accept different combinations of input files, such as using just a single fragmentation file for both the MS1 and MS2 peaks, are also provided in our workflow). The data conversion process starts with the detection of MS1 peak in the input .mzXML file obtained from full-scan mode spectra using the CentWave algorithm from XCMS (1) and the .mzML file obtained in MS/MS mode. Matching of a parent (MS1) LC-MS peak to fragment (MS2) peaks are then established using a script based on the RMassBank package (2), through greedy search for the most intense unique MS2 spectrum (more intense fragmentation spectra are generally information-richer) that can be linked to an MS1 LC-MS peak within a specified retention time (RT) window. A filtering step based on RT and intensity is applied to remove noisy peaks, as well as the washing part, equilibration part, and the start of the chromatogram prior to the injection peak. Finally, any MS1 peak not having paired MS2 peaks is discarded. This process leaves unique MS1-MS2 pairs, thereby omitting the lower intense fragmentation spectra of MS1 peaks that were fragmented multiple times. This greatly helps in the LDA modelling, as multiple spectra of the same MS1 peak could be considered as conserved mass fragmental motif in the data set.

————— *MS1 feature extracted* —————→

|                          | <b>MS1_a</b> | <b>MS1_b</b> | <b>MS1_c</b> | <b>MS1_d</b> | <b>MS1_e</b> | ... |
|--------------------------|--------------|--------------|--------------|--------------|--------------|-----|
| <b>Fragment_119.0351</b> | 0            | 100          | 24           | 37           | 0            |     |
| <b>Fragment_136.0629</b> | 87           | 0            | 17           | 18           | 0            |     |
| <b>Fragment_156.0769</b> | 55           | 20           | 0            | 10           | 100          |     |
| ...                      |              |              |              |              |              |     |
| <b>Loss_18.0080</b>      | 56           | 0            | 0            | 10           | 15           |     |
| <b>Loss_36.0183</b>      | 0            | 0            | 30           | 0            | 0            |     |
| <b>Loss_46.0053</b>      | 40           | 40           | 10           | 87           | 100          |     |
| ...                      |              |              |              |              |              |     |

↓ *Binned MS2 fragments and losses*

Figure S-2. The data-frame extracted from fragmentation data: a matrix of XCMS-picked MS1 peaks (columns) and binned mass fragment (and neutral loss) features with normalized (0 – 100 scale) intensities.

The next step in the data conversion stage is the transformation of the spectral data into a format that is suitable for concurring pattern discovery, which is a matrix consisting of the MS1 peaks (columns) and their correspondent MS2 fragments (rows) or losses (see Figure S-2). Drawing an analogy from text processing, each MS1 peak can now be seen as a ‘document’ while the linked MS2 spectrum associated to each MS1 peak produce the ‘word’ features in a document. Note that following the bag-of-words assumption, LDA does not take into account the word order, but merely the word count, i.e., the number of times a word occurs in a document (further described in Section S1.2). For each MS1 peak, two types of word features can be extracted from a MS2 fragmentation spectrum:

- **Fragment features**, which are the discretized mass values of the MS2 peaks. A greedy binning process is used to group MS2 peaks within a certain user-defined m/z window from the next unprocessed MS2 peak. This way, MS2 peaks with close-enough m/z values but observed in different precursor MS1 peaks are linked and placed into the same discrete bin – each bin corresponds to a fragment feature. The input for inference in textual LDA is the count of occurrences of words in each document; in MS2LDA, the intensity values of MS2 peaks can be considered to be proxies for word counts. These intensity values are normalized by dividing to the largest intensity value in the fragmentation spectrum and discretized on a scale of 0 to 100 (integers).
- **Loss features**, which is the discretized mass values of the neutral losses. Neutral losses are the mass differences between a precursor MS1 peak and each of its MS2 peaks in the spectrum. To produce the loss features, we find the m/z difference between each fragment peak to its precursor ion. Similar to fragment features, the normalized intensity values of the neutral losses, represented by the intensities of their resulting mass fragments, are used as proxies for the loss counts.

We provide a single configuration file that encodes user-defined data conversion parameters as key-value pairs in a human-readable textual (YAML) format, as many parameters of the data conversion step are platform-dependent. A single ‘R’ script is then provided to load all the user-defined parameters from the configuration file and start the entire data conversion step. An example configuration file, used for data processing and analysis in this paper, is provided in our online repository.

## Special feature extraction pipeline for GNPS and MassBank

For validations of fixed Mass2Motifs (learnt from the beer dataset) that were applied to the GNPS and MassBank datasets, an alternative feature extraction pipeline was required. Firstly, a parser was written to read GNPS and MassBank datasets that are available in the .MGF format. Gaussian kernel density estimation was used to combine fragments and neutral losses observed in different spectra into a global fragment vocabulary. This was found, via visual inspection, to produce better fragment groupings for this data than the mass binning approach in Section S1.1. Gaussian kernel widths were set such that 3 standard deviations were equal to 7ppm for the fragments features and 15ppm for the loss features (the higher value for the loss features is justified by the fact that they are computed as the difference between two noise measurements). Features are extracted as the modes (maxima) of the density estimate with their width determined by when the density hits a minimum or the width exceeds a maximum (50ppm).

### S1.2 Mass2Motif Discovery Stage

Given the matrix of features co-occurrences produced from the data conversion stage, our goal is to infer the concurring patterns of features shared by the fragmentation spectra. Following the Latent Dirichlet Allocation (LDA) model, a fragmentation spectrum can be seen as a mixture over potentially substructure patterns (which we called Mass2Motifs), each of which is itself a distribution over fragment/loss word features. A fragmentation spectrum, linked to a particular MS1 peak, can therefore be generated in this model by firstly sampling for the Mass2Motifs that the spectrum is comprised of and subsequently sampling the specific fragment/loss features from the selected Mass2Motifs. A brief summary of the LDA model in the context of fragmentation data and the inferential procedure is described next. To infer the latent Mass2Motifs present in the data, a Python implementation of a collapsed Gibbs sampling scheme is used in our MS2LDA workflow (3).

We assume the bag-of-words model, where within each fragmentation spectrum the observed MS2 word features are exchangeable, i.e., their order does not matter, only their observed counts (intensities) matter. Given some  $K$  Mass2Motifs (indexed by  $k = 1, \dots, K$ ), the observation of the  $n$ -th word in the  $d$ -th MS1 document can be described by the following generative process:

$$\begin{aligned}w_{dn}|z_{dn} &\sim \text{Multinomial}(\varphi_{z_{dn}}) \\z_{dn}|\theta_d &\sim \text{Multinomial}(\theta_d) \\ \theta_d|\alpha &\sim \text{Dirichlet}(\alpha) \\ \varphi_k|\beta &\sim \text{Dirichlet}(\beta)\end{aligned}$$

In other words, observation on the  $n$ -th word in the  $d$ -th MS1 fragmentation spectra ( $w_{dn}$ ) is conditioned on the assignment of MS2 fragment/loss word  $w_{dn}$  to some  $k$ -th Mass2Motif multinomial distribution (corresponding to a concurring pattern of fragments and/or losses). This assignment is denoted by the indicator variable  $z_{dn}$ , so  $z_{dn} = k$  if  $w_{dn}$  is assigned to a  $k$ -th multinomial. The  $k$ -th multinomial distribution that an MS2 word is assigned to is characterized by the parameter vector  $\varphi_{z_{dn}}$ . However,  $\varphi_{z_{dn}}$  is itself drawn from a prior Dirichlet distribution with parameter vector  $\beta$ . The probability of seeing certain Mass2Motifs for each  $d$ -th fragmentation spectra is then drawn from a multinomial distribution with a parameter vector  $\theta_d$ . This parameter vector  $\theta_d$  is in turn drawn from a prior Dirichlet distribution having parameter vector  $\alpha$ . Intuitively, if we assume symmetric prior on the  $\alpha$  and  $\beta$  vectors (i.e. they are scalar), a high value set on  $\alpha$  means each fragmentation spectra is likely to contain a mixture of most Mass2Motifs, while lower values on  $\alpha$  means fragmentation spectra will contain fewer Mass2Motifs. Similarly, higher  $\beta$  means a Mass2Motif is likely contain a mixture of most words, while lower  $\beta$  leads to a Mass2Motif containing a mixture of fewer words.

Given the matrix of fragment/loss word counts produced from the feature extraction step and user-defined choices of hyper-parameters ( $\alpha, \beta, K$ ) that suit the input data, the posterior distributions of documents-to-topics (all the  $\theta_d$ s) and topics-to-words (all the  $\varphi_k$ s) can be approximated.

## Gibbs sampling

We follow the method described by (3) and use a collapsed Gibbs sampling scheme to perform inference. Gibbs sampling is an instance of Markov chain Monte Carlo algorithm commonly used to approximate posterior distributions in Bayesian inference where direct sampling or closed form solutions are difficult to obtain. In this particular case of LDA inference, the input to Gibbs sampling is the observed counts of fragment/loss words co-occurrences in fragmentation spectra (documents) and as output, we infer the latent Mass2Motif-to-words distributions and fragmentation spectra-to-Mass2Motif distributions present in the data.

Since Dirichlet priors are conjugate to the multinomial distributions  $\theta$  and  $\varphi$ , we can marginalize out the  $\theta$  and  $\varphi$  parameters. Assuming a symmetric prior probability distribution on  $\alpha$  and  $\beta$ , the conditional probability for the assignment of the  $n$ -th fragment/loss word feature in the  $d$ -th fragmentation spectrum (linked to a particular MS1 peak) to the  $k$ -th Mass2Motif is denoted here:

$$P(z_{dn} = k | w_{dn}, \dots) \propto \frac{c_{kn} + \beta}{c_k + N\beta} \cdot c_{dk} + \alpha$$

where:

- $c_{kn}$  is the count of the number of word  $n$  in the vocabulary that are currently assigned Mass2Motif  $k$
- $c_k$  is the count of all words currently assigned to Mass2Motif  $k$
- $c_{dk}$  is the count of words from MS1 peak  $d$  assigned to Mass2Motif  $k$

All these counts are computed after removing the current word  $w_{dn}$  being iterated upon in the Gibbs sampling step. Finally, to approximate the document-to-topic distributions ( $\theta_d$  for each MS1 peak or document  $d$ ) and the topic-to-word (or Mass2Motif to fragment or loss feature) distributions ( $\varphi_k$  for each topic  $k$ ), we use the expectation of a Dirichlet distribution, the expected values of the parameters  $\theta$  and  $\varphi$  given  $w$  and  $z$  are:

$$\theta_{dk} = \frac{c_{dk} + \alpha}{c_d + K\alpha}$$
$$\varphi_{kn} = \frac{c_{kn} + \beta}{c_k + N\beta}$$

In our Gibbs sampling implementation, only the last sample (after monitoring for convergence) was used for the purpose of analysis (as an alternative, we can also average the posterior estimates over the samples, although we found no discernible difference between using the final sample and using the mean taken over multiple samples). Due to the stochastic nature of the Gibbs sampling procedure, we might get slightly different results each time, which may be undesirable. To overcome this, we set a constant random seed for the sampler, allowing us to get the same inference results each time, provided the same parameters of  $K$ ,  $\alpha$ ,  $\beta$  are used with the same input files.

## Variational inference

In addition to Gibbs sampling, we have also implemented Variational Bayesian inference for LDA using the algorithm described in (5). In essence, the variational method approximates the intractable posterior density via a product of densities which are updated in an iterative manner until convergence. Once converged, the algorithm provides the Mass2Motif to feature distributions, as well as Dirichlet distributions for the spectra to Mass2Motif relationship and the global Mass2Motif relationship. In our experiments we have found no discernible difference between the output of the Gibbs sampler and Variational Bayesian implementations although the Variational Bayes method is faster (see the Running Times section below).

## Cross-validation

The number of Mass2Motifs and model fit are estimated via a 4-folds cross-validation approach. For each test fold being held out in the fragmentation spectra data set, an estimate of the model evidence is computed after training the model on the remaining training folds in the data set. A comparison of LDA against the multinomial

mixture model (clustering) is provided in Section S2.10. A crucial difference between LDA and standard mixture-model clustering lies in the modelling assumption that a document is a mixture of one or more topics (LDA) as opposed to each document having exactly one topic (clustering). We compare the model fit of LDA against clustering by evaluating the log evidence and perplexity on a held-out beer data file (beer3 positive ionization mode). The perplexity measures how well a probability distribution or probability model predicts a sample and is defined as:

$$\text{perplexity}(W) = \exp\left(\frac{\sum_d \log(P(w_d))}{\sum_d N_d}\right)$$

where  $\text{perplexity}(W)$  is the perplexity on the whole held-out test collection,  $P(w_d)$  is the marginal probability of a testing document  $d$  (integrating over all the parameters of the model), approximated via an importance sampling method as described by Wallach et al. (4) and  $N_d$  is the number of words in each testing document  $d$ . We follow (3) and set the value of the hyperparameters  $\alpha = K/50$  and  $\beta = 0.1$  for LDA during the cross-validation experiment. For mixture model clustering, a non-informative Dirichlet prior (with constant parameter  $\alpha = K/50$ , where  $K$  is now the number of clusters) is set on the proportions of the mixture components and another Dirichlet prior (with constant hyper-parameter  $\beta = 0.1$ ) is set on cluster-specific word distributions. The Gibbs sampler for LDA and multinomial mixture model is run for 1000 samples, discarding the first 500 for burn-in. The lower perplexity (shown in Section 2.10, Figure S-15) demonstrates that LDA provides a better model fit on the held-out data compared to multinomial mixture model.

#### Incorporating previously defined Mass2Motifs

In our experiments on Massbank, GNPS and urine data, we incorporated Mass2Motifs from the beer analysis into the MS2LDA framework. This is straightforward within the Variational Bayesian framework if features can be matched across the two analysis. In particular, when updating the Mass2Motif to feature probability distributions, we can leave some (the previously defined ones) unchanged and just update the others – i.e. our model consists of static, previously defined Mass2Motifs and new, learnable ones. In our experiment, we fixed the ~30 Mass2Motifs that were characterized in beer and updated the other 470 in the Variational Bayesian inference routine. To match the features, we took the features present in each of the characterized beer Mass2Motifs and searched for them in the features generated for the new analysis. For each Mass2Motif, we added up the feature probabilities for those that could be matched. A Mass2Motif was included in the new analysis if features making up at least 0.5 of their probability could be matched.

#### Running times

We provide an illustrative example of the running time of the MS2LDA pipeline for a beer sample on a laptop (Intel Core i7, 16GB RAM). The data conversion stage includes the peak detection step via the CentWave algorithm from XCMS, the linking of parent (MS1) peak to fragment (MS2) peaks using the script based on RMassBank, as well as the binning process to create fragment and loss features. This was completed in 20 minutes and produces a matrix of features co-occurrences that can be used for LDA inference. During inference, running Gibbs sampling with 1000 posterior samples requires approximately an hour. The alternative of running Variational Bayesian inference with 1000 steps takes half an hour.

The running time required for the data processing and inference steps of a single sample in MS2LDA is therefore approximately 1.5 hours in total.

### S1.3 Candidate Elemental Formula Assignment

The MS2LDA workflow provides two optional methods to assign candidate elemental formulae to the mass fragments, neutral losses, and precursor ions. The first is achieved by integrating SIRIUS (Sum formula Identification by Ranking Isotope patterns Using mass Spectrometry, (6)) into our workflow. SIRIUS assigns elemental formula by posing it as an integer decomposition problem and solving it through a dynamic



programming approach ('Round Robin') (7). SIRIUS is freely-available and, as it is written in Java, can in theory be run platform-independently on any Windows, Unix and Mac environment (in practice, library dependencies have to be satisfied before SIRIUS can be run on the target computer). Integration of SIRIUS into our workflow is achieved by wrapping calls to the Java package of SIRIUS through a separate sub-process, passing it a temporary .MGF file that corresponds to each fragmentation spectrum. SIRIUS assigns elemental formulae to each combination of MS1 and MS2 peaks independently, which may lead to mass fragments of similar m/z value being assigned an elemental formula in some spectra, but not in all.

As an alternative strategy for annotation, our workflow also provides a pure Python implementation of an elemental formula assigner (called 'EF-Assigner') based on the Round Robin algorithm that also lies at the heart of SIRIUS. Once the initial assignment of potential candidate formulae to mass fragments, neutral losses and also precursor ion masses has been performed, the list of candidate formulae is further filtered using our implementation of the 7-golden rules, a set of heuristic rules introduced by Kind and Fiehn (8). This filtering step is used to remove chemically-unlikely elemental formula compositions from the candidate list. Advantages of the EF-Assigner module are its easy compatibility to the MS2LDAvis module (which is also written in Python) and it assigns elemental formulae to the binned fragments and losses in the matrix instead of to individual spectra. However, unlike SIRIUS that uses the complete information of the precursor ion and fragments peaks in a spectrum for annotation, EF-Assigner assigns the elemental formulae for the MS1 peaks, mass fragments and neutral losses independently.

## S1.4 Visualisation Using the MS2LDAvis Module

Inference results from LDA can be challenging to interpret due to the (still) high dimensionality of the data. Analysis of Mass2Motifs to examine if they correspond to actual structural features or biochemical substructures is an iterative and exploratory process. In our workflow, this is made possible through the MS2LDAvis module -- an interactive web-based visualization that can be used to explore and validate Mass2Motifs from MS2 data. MS2LDAvis is extended from the Python port of the topic modelling visualization interface LDAvis (9), which is built upon the combination of the Javascript/D3 library. While initially based on LDAvis, the MS2LDAvis module has been greatly customized to suit our Mass2Motifs and fragmentation data exploration needs.

**A. Main MS2LDAvis screen**

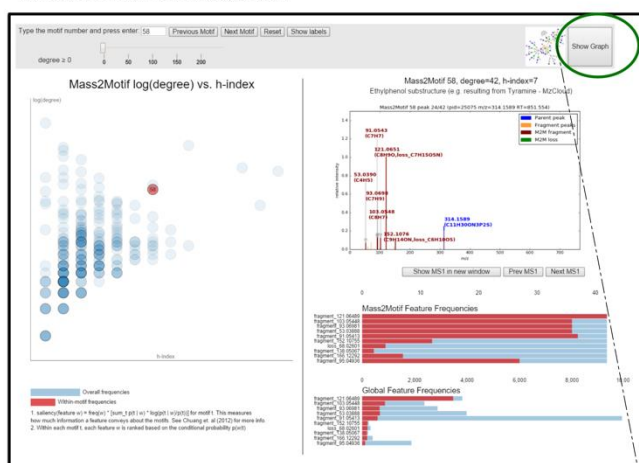

**B. Pop-up Network Graph**

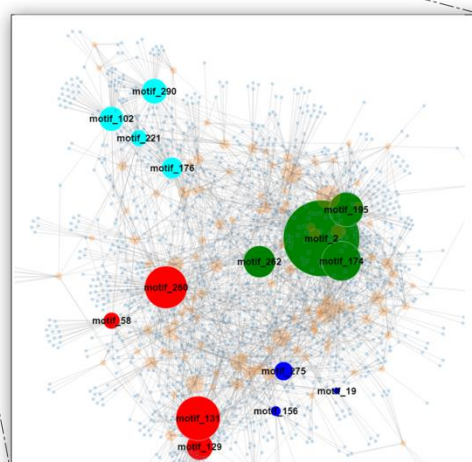

Figure S-3. A) The main MS2LDAvis screen, while B) is the network graph of beer3 extract positive ionization mode file where a number of Mass2Motifs were selectively colored before loading the network visualization. Mass2Motifs circles are proportional to their degree (number of connections), whereas small blue squares represent fragmented MS1 peaks.

Similar to the original LDAvis, the left panel of our MS2LDAvis module shows a global view of the model, whilst the right panel zooms into a specific Mass2Motif (see Figure S-3A). However, unlike LDAvis where topics are displayed on the left panel through multidimensional scaling that projects topics to two dimensions, the two axes in our MS2LDAvis panel are the log-degree and the  $h$ -index of Mass2Motifs. We defined the *degree* of a Mass2Motif as the number of fragmentation spectra explained by the Mass2Motif at the user-defined thresholding level  $t_\theta$  on the fragmentation-spectra-to-Mass2Motif distributions (the  $\theta$  parameters). The  $h$ -index of a Mass2Motif is defined in a similar manner to the conventional  $h$ -index for scientific publications of a researcher. A Mass2Motif has an index of  $h$  if it has  $h$  fragment/loss features obtained after setting a user-defined threshold  $t_\phi$  on the Mass2Motif-to-word distributions (the  $\phi$  parameters), each of which occur in the set of thresholded documents at least  $h$  times. Intuitively, Mass2Motif with high degrees but low  $h$ -index could potentially correspond to simple structural features or substructures that occur in many MS2 fragmentation spectra, while Mass2Motif with high  $h$ -index but lower degrees could potentially correspond to more unique and complex substructures shared by fewer MS2 spectra.

The left and right panels of our visualization are linked such that selecting a Mass2Motif on the left changes the information displayed on the right panel. We further enhanced MS2LDAvis by plotting the fragmentation spectra of each MS1 peak (documents) above the user-defined threshold  $t_\theta$  in the selected Mass2Motif. The fragment and loss words in the fragmentation spectra that are explained by the currently selected Mass2Motif, i.e., above the user-defined threshold  $t_\phi$ , are highlighted in bold and user can easily flip through different fragmentation spectra explained by the topic by clicking the *Previous MS1* and *Next MS1* buttons under the fragmentation spectra plot. The bottom of the right panel displays two feature frequency histograms; the Mass2Motif Feature Frequencies histogram displays the counts of each Mass2Motif associated fragment or loss (above the user-defined threshold  $t_\phi$  on the Mass2Motif-to-features distributions [the  $\phi$  parameters]) within the fragmentation spectra explained by the Mass2Motif. Similarly, the Global Feature Frequencies histogram displays the overall frequency of the fragments or losses within the complete data set that can be explained by the currently selected Mass2Motif. This provides an estimate of how unique the fragment/loss features are in the whole data set.

Finally, to complement our main view, we also allow the possibility of exploring the inferred substructure data in a pop-up network graph (see Figure S-3B), where Mass2Motifs and MS1 peaks form the nodes in the graph and edges are drawn between them if a document is explained by a topic with conditional probability above the user-defined threshold  $t_\theta$ . The graph view can be accessed by clicking on the *Show Graph* button on the top panel of the main window. To minimize clutter in the network graph, user can also define a threshold on the degree of the Mass2Motifs, i.e., all Mass2Motifs with a degree of 10 or lower can easily be removed from the graph. Nodes in the graph can also be shown, hidden and coloured according to user-defined specifications before the visualisation interface is called (see Figure S-2B). The two complementary views are linked such that clicking a topic node on the network graph will select the corresponding topic on the main view and vice versa. The network graph is particularly useful in exploring the relationships between Mass2Motifs and investigating which MS1 peaks have fragmentation spectra that can be explained by multiple Mass2Motifs.

## **SECTION S2. SUPPORTING RESULTS**

This section contains all the supporting Figures and Tables and accompanying explanatory texts that support the results in the manuscript. Please note that Supporting Tables S-4 and S-5 can be found as separate Word files.

### **S2.1 Mass2Motif structural characterizations**

All Mass2Motifs in positive and negative mode ionization files with degrees of 10 or more were investigated to see if they represented any biochemical relevant substructure or structural feature. The resulting structural characterizations were collected in tabular format. Information on the key mass fragments, neutral losses, and degrees across the four beer files is shown in the Tables. A confidence was given to the structural characterization based on the collected evidence, using spectra matching to MzCloud ([www.mzcloud.org](http://www.mzcloud.org)) and expert knowledge.

Table S-4. Table with Mass2Motifs (MSMs) discovered in the four positive ionization mode fragmentation files of the beer extracts.

Table with M2Ms in four beers – fragments/losses associated to the M2Ms can slightly differ in between beers due to degree and type of metabolites associated to the M2M. Experimental masses are within 5 ppm of theoretical masses as found in topics. Slight changes are observed per file. Annotated Mass2Motifs: Bold represents highest level of confidence (i.e., several fragments or specific mass value that can only point to a certain combination of ions), bold and italic is second-highest level of confidence (i.e., match on elemental formula (EF) only – but in the given sample matrix it is quite a likely structural annotation), just italic is the third-highest level of confidence (i.e., no specific structure found, often generic fragments that have multiple possible structural confirmations), and plain text represents the lowest level of confidence.

| Beer1      | Beer2 | Beer3      | Beer4 | Frag/<br>Loss | m/z | EF         | Characterization |               |                     |                 |                                                                                                                                               |
|------------|-------|------------|-------|---------------|-----|------------|------------------|---------------|---------------------|-----------------|-----------------------------------------------------------------------------------------------------------------------------------------------|
| <b>52</b>  | 199   | <b>65</b>  | 282   | <b>2</b>      | 229 | <b>9</b>   | 228              | Frag          | 70.0652             | C4H8N           | <i>Small nitrogen containing fragment ion – often proline or ornithine derived – most abundant fragment in all four beers</i>                 |
| <b>37</b>  | 127   | <b>182</b> | 142   | <b>260</b>    | 123 | <b>193</b> | 142              | Loss          | 18.0080             | H2O             | <b>Water loss - indicative of a free hydroxyl group) – often seen in sugary structures</b>                                                    |
| <b>230</b> | 99    | <b>208</b> | 100   | <b>262</b>    | 90  | <b>273</b> | 80               | Loss          | 46.0053             | CH2O2           | <b>Combined loss of H2O and CO – indicative for free carboxylic acid group (COOH) – generic substructure in amino acids and organic acids</b> |
| <b>148</b> | 67    | <b>20</b>  | 106   | <b>195</b>    | 98  | <b>77</b>  | 49               | Frag,<br>Frag | 72.0807,<br>55.0546 | C4H10N,<br>C4H7 | <i>Aliphatic amine (NH3 loss indicates free NH2 group coupled to aliphatic chain)</i>                                                         |
| <b>24</b>  | 24    | <b>168</b> | 25    | <b>226</b>    | 29  | <b>189</b> | 25               | Loss          | 162.0531            | C6H10O5         | <b>Loss of [hexose-H2O] – indication of hexose conjugation (for example</b>                                                                   |

|                     |            |                   |          |                     |            |            |     |                        |                                  |                              |                                                                                                                                                                                      |
|---------------------|------------|-------------------|----------|---------------------|------------|------------|-----|------------------------|----------------------------------|------------------------------|--------------------------------------------------------------------------------------------------------------------------------------------------------------------------------------|
|                     |            |                   |          |                     |            |            |     |                        |                                  |                              | <b>glucose)</b>                                                                                                                                                                      |
| <b>55</b>           | 14         | -                 | -        | -                   | -          | -          | -   | Loss                   | 74.0002                          | C2H3O2                       | <i>Free CO2 + CO loss, loss part of CH2O2-loss M2M for other beers</i>                                                                                                               |
| <b>217</b>          | 61         | <b>89</b>         | 101      | <b>158</b>          | 66         | <b>169</b> | 38  | Frag,<br>Frag          | 86.0965,<br>132.1016             | C5H12N,<br>C6H14NO2          | <b>Leucine related substructure (mzCloud) – prevalent in Beer 2</b>                                                                                                                  |
| <b>45</b>           | 39         | <b>268</b>        | 6        | <b>243,<br/>127</b> | 30,<br>14  | <b>149</b> | 31  | Frag                   | 98.9839                          | H4O4P                        | <b>Fragment ion indicative for conjugation of a phosphate group (H4O4P)</b>                                                                                                          |
| <b>74</b>           | 36         | -                 | -        | -                   | -          | <b>210</b> | 98  | Frag,<br>Frag          | 85.0283,<br>57.0332              | C4H5O2,<br>C3H5O             | Two small fragments with CO loss in between. Unclear if it points to a specific substructure.                                                                                        |
| <b>238</b>          | 31         | <b>46<br/>297</b> | 20<br>21 | <b>53</b>           | 25         | <b>250</b> | 27  | Loss,<br>Loss          | 179.0791,<br>197.0899            | C6H13NO5,<br>C6H15NO6        | <i>Losses indicative of a hexose with NH2 group – EF fits</i>                                                                                                                        |
| <b>129</b>          | 18         | <b>37</b>         | 22       | <b>98</b>           | 23         | <b>28</b>  | 22  | Frag,<br>Frag          | 98.0600,<br>144.0658             | C5H8NO,<br>C6H10NO3          | <i>Fragment ions possibly indicative for N-Methyl-oxo-pyrrolidinecarboxylic acid like structure (loss of free carboxyl group)</i>                                                    |
| <b>111,<br/>270</b> | 123,<br>27 | <b>63</b>         | 147      | <b>174,<br/>59</b>  | 114,<br>20 | <b>170</b> | 114 | Frag,<br>Frag,<br>Frag | 84.0442,<br>56.0498,<br>130.0505 | C4H6NO,<br>C3H6N,<br>C5H8NO3 | <b>Fragment ions indicative for pyroglutamic acid (pyroglutamate) or lysine (MzCloud) – structure can be formed from glutamic acid (glutamate) in the mass spectrometer as well.</b> |
| <b>103</b>          | 41         | <b>61</b>         | 64       | <b>214</b>          | 57         | <b>205</b> | 41  | Loss                   | 17.0247                          | NH3                          | <b>Amine loss - Indicative for free NH2 group in</b>                                                                                                                                 |

|            |    |            |    |            |    |            |    |                                 |                                               |                                 |                                                                                                                                                                                               |
|------------|----|------------|----|------------|----|------------|----|---------------------------------|-----------------------------------------------|---------------------------------|-----------------------------------------------------------------------------------------------------------------------------------------------------------------------------------------------|
|            |    |            |    |            |    |            |    |                                 |                                               |                                 | <b>fragmented molecule</b>                                                                                                                                                                    |
| <b>38</b>  | 39 | <b>45</b>  | 42 | <b>60</b>  | 40 | <b>89</b>  | 44 | Loss                            | 36.0183                                       | H4O2                            | <b>Double water loss, i.e., 2*H2O – Generic feature for metabolites containing several free OH groups attached to a aliphatic chain, like sugars.</b>                                         |
| <b>263</b> | 36 | <b>90</b>  | 31 | <b>151</b> | 35 | <b>202</b> | 19 | Frag,<br>Loss                   | 116.0712,<br>115.0630                         | C5H10NO2,<br>C5H9NO2            | <i>Fragment and loss of [proline-H2O] - indicative for conjugated proline – EF fits</i>                                                                                                       |
| <b>157</b> | 27 | <b>136</b> | 30 | <b>280</b> | 30 | <b>36</b>  | 29 | Loss                            | 60.0210                                       | C2H4O2                          | Loss possibly indicative of carboxylic acid group with 1-carbon attached.                                                                                                                     |
| <b>264</b> | 25 | <b>81</b>  | 12 | <b>40</b>  | 15 | -          | -  | Frag,<br>Frag,<br>Frag          | 83.0604,<br>56.0498,<br>129.0658              | C4H7N2,<br>C3H6N,<br>C5H9N2O2   | <b>Imidazole group linked to a carboxylgroup through one CH2 group, i.e., like in imidazole acetic acid - Prevalent in Beer1</b>                                                              |
| <b>160</b> | 14 | <b>298</b> | 44 | <b>284</b> | 30 | -          | -  | Frag,<br>Frag,<br>Frag          | 109.0288,<br>81.0333,<br>53.0888              | C6H5O2,<br>C5H5O,<br>C4H5       | <b>Fragments indicative for dihydroxylated benzene ring substructure (MzCloud) – C6H5O2 fragment corresponds to positively charged fragment with two hydroxyl groups.</b>                     |
| <b>226</b> | 75 | <b>72</b>  | 38 | <b>276</b> | 20 | <b>68</b>  | 39 | Frag,<br>Frag,<br>Frag,<br>Frag | 105.0702,<br>79.0541,<br>91.0541,<br>53.0388, | C8H9,<br>C6H7,<br>C7H7,<br>C4H5 | <b>Alkyl aromatic substructure – indicative for aromatic ring with 2-carbon alkyl chain attached, i.e., phenylethene fragment from ethylbenzene as a result of the fragmentation process.</b> |

|     |    |     |    |            |           |             |    |                                 |                                                |                                             |                                                                                                                                                                                                                                                                                                                     |
|-----|----|-----|----|------------|-----------|-------------|----|---------------------------------|------------------------------------------------|---------------------------------------------|---------------------------------------------------------------------------------------------------------------------------------------------------------------------------------------------------------------------------------------------------------------------------------------------------------------------|
| 165 | 56 | 53  | 77 | 45         | 56        | 79          | 48 | Frag,<br>Frag,<br>Frag          | 84.0808,<br>56.0498,<br>67.0546                | C5H10N,<br>C3H6N,<br>C5H7                   | <b>Fragment ions indicative for<br/>pipecolic acid (pipecolate)<br/>(MzCloud) - Quite<br/>prevalent, especially in<br/>Beer2</b>                                                                                                                                                                                    |
| 131 | 46 | 108 | 41 | 79,<br>184 | 20,<br>22 | 243         | 43 | Frag,<br>Frag,<br>Frag          | 58.0655,<br>118.0861,<br>59.0733               | C3H8N,<br>C5H12NO2,<br>C3H9N                | <b>Fragment ions indicative for<br/>trimethylated amine<br/>connected to a carboxylic<br/>acid group, i.e., like in<br/>betaine (MzCloud)</b>                                                                                                                                                                       |
| 142 | 44 | 6   | 19 | 130        | 10        | 69          | 17 | Frag,<br>Frag,<br>Loss,<br>Loss | 112.0511,<br>95.0239,<br>132.0419,<br>149.0685 | C4H6N3O,<br>C4H3N2O,<br>C5H8O4,<br>C5H11NO4 | <b>Fragment ions indicative for<br/>cytosine, and a loss of<br/>conjugated deoxyribose –<br/>possibly combined due to<br/>many spectra that combine<br/>these two substructures.<br/>Loss of NH2 group is likely<br/>from remaining fragment<br/>after loss of deoxyribose. –<br/><br/>Quite prevalent in Beer1</b> |
| 36  | 36 | 102 | 41 | 209        | 48        | 30          | 25 | Frag,                           | 114.05601,                                     | C4H8NO,                                     | Possibly suggests 2-<br>pyrrolidine substructure –<br>Mass2Motif not consistent<br>over the four beers.                                                                                                                                                                                                             |
| 36  |    | 102 |    |            |           | 86 +<br>69! |    | Frag,                           | 68.0498,                                       | C4H6N,                                      |                                                                                                                                                                                                                                                                                                                     |
| 36  |    | 240 | 59 | 209        |           |             |    | Frag,                           | 69.0337,                                       | C4H5O,                                      |                                                                                                                                                                                                                                                                                                                     |
| 36  |    | 240 |    |            |           |             |    | Frag                            | 53.0026                                        | C3HO                                        |                                                                                                                                                                                                                                                                                                                     |
| 40  | 26 | 266 | 24 | 154        | 26        | 118         | 5  | Frag,<br>Frag                   | 71.0687,<br>117.0740                           | n/a,<br>n/a                                 | <i>C13 isotope peaks of proline<br/>(abundant ions taken for<br/>fragmentation)</i>                                                                                                                                                                                                                                 |
| 56  | 19 | 262 | 20 | 34         | 14        | -           | -  | Loss,                           | 88.0159,                                       | C3H4O3,                                     | Combination of small losses –<br>free carboxylgroup and acetyl<br>group loss + loss of NH2                                                                                                                                                                                                                          |

|            |    |            |    |            |    |            |    |                                          |                                                           |                                                    |                                                                                                                                                        |
|------------|----|------------|----|------------|----|------------|----|------------------------------------------|-----------------------------------------------------------|----------------------------------------------------|--------------------------------------------------------------------------------------------------------------------------------------------------------|
|            |    |            |    |            |    |            |    | Loss,<br>Loss                            | 42.0107,<br>105.0425                                      | C2H2O,<br>C3H7NO3                                  | group in some cases                                                                                                                                    |
| <b>293</b> | 18 | <b>33</b>  | 15 | -          | -  | <b>262</b> | 14 | Loss,<br>Loss,<br>Frag                   | 60.0322,<br>59.0483,<br>60.0559                           | CH4N2O,<br>CH5N3,<br>CH6N3                         | Fragment and losses possibly indicative for guanidino group (CH6N3)                                                                                    |
| <b>225</b> | 17 | <b>51</b>  | 20 | <b>168</b> | 18 | <b>258</b> | 18 | Frag,<br>Frag,<br>Frag                   | 181.0970,<br>209.0925,<br>125.0708                        | C9H13N2O2,<br>C10H13N2O3,<br>C6H9N2O               | Unclear yet what these fragments relate to.                                                                                                            |
| <b>33</b>  | 16 | <b>118</b> | 11 | <b>149</b> | 16 | <b>172</b> | 15 | Frag,<br>Frag                            | 96.0441,<br>124.0398                                      | C5H6NO,<br>C6H6NO2                                 | Possibly suggests 2-pyridone/ol substructure                                                                                                           |
| <b>185</b> | 15 | <b>166</b> | 23 | <b>220</b> | 32 | <b>24</b>  | 19 | Frag,<br>Frag                            | 136.0629,<br>119.0351                                     | C5H6N5,<br>C5H3N4                                  | <b>Fragments indicative adenine (C5H6N5) substructure – most prevalent in Beer3</b>                                                                    |
| <b>110</b> | 42 | <b>116</b> | 38 | <b>97</b>  | 31 | <b>29</b>  | 30 | Loss,<br>Loss,<br>Frag,<br>Frag,<br>Frag | 180.0632,<br>198.0738,<br>85.0283,<br>69.0337,<br>81.0334 | C6H12O6,<br>C6H14O7,<br>C4H5O2,<br>C4H5O,<br>C5H5O | Oxygen-rich losses and fragments also occurring in hexose spectra – related to M2M 211 (hexose [glucose] conjugation) – possibly hydrated-hexose loss? |
| <b>279</b> | 23 | <b>202</b> | 22 | <b>55</b>  | 23 | <b>157</b> | 27 | Frag,<br>Frag,<br>Frag,<br>Frag          | 91.0541,<br>119.0488,<br>147.0437,<br>65.0388             | C7H7,<br>C8H7O,<br>C9H7O2,<br>C5H5                 | <b>Fragments indicative for cinnamic acid (cinnamate) substructure (MzCloud)</b>                                                                       |



|            |    |            |    |            |    |            |    |                                          |                                                             |                                                         |                                                                              |
|------------|----|------------|----|------------|----|------------|----|------------------------------------------|-------------------------------------------------------------|---------------------------------------------------------|------------------------------------------------------------------------------|
| <b>298</b> | 21 | <b>77</b>  | 10 | <b>90</b>  | 12 | <b>98</b>  | 24 | Loss,<br>Loss,<br>Loss,<br>Loss          | 78.0316,<br>120.0420,<br>108.0421,<br>66.0320               | C2H6O3,<br>C4H8O4,<br>C3H8O4,<br>CH6O3                  | Combinations of small generic losses like CH2O2 + CH4O = C2H6O3              |
| <b>294</b> | 19 | <b>289</b> | 27 | <b>241</b> | 21 | <b>47</b>  | 25 | Frag,<br>Frag,<br>Frag,<br>Frag          | 110.0718,<br>156.0769,<br>93.0450,<br>95.0608               | C5H8N3,<br>C6H10N3O2,<br>C5H5N2,<br>C5H7N2              | <b>Fragments indicative for histidine (C6H10N3O2) substructure (MzCloud)</b> |
| <b>114</b> | 18 | -          | -  | -          | -  | <b>181</b> | 17 | Loss,<br>Loss,<br>Loss,<br>Loss          | 59.0370,<br>89.0476,<br>42.0107,<br>87.0320                 | C2H5NO,<br>C3H7NO2,<br>CH2O,<br>C4H9NO                  | Combinations of small generic losses like C2H2O + NH3 = C2H5NO               |
| <b>80</b>  | 16 | -          | -  | <b>13</b>  | 10 | -          | -  | Frag,<br>Frag                            | 129.0658,<br>147.0759                                       | C5H9N2O2,<br>C5H11N2O3                                  | <b>Fragment ions indicative for glutamine (C5H11N2O3) substructure</b>       |
| <b>177</b> | 21 | <b>117</b> | 50 | <b>115</b> | 28 | <b>110</b> | 26 | Frag,<br>Frag,<br>Frag                   | 120.0808,<br>103.0546,<br>91.0541                           | C8H10N,<br>C8H7,<br>C7H7                                | <b>Fragments indicative for [phenylalanine-CHOOH] based substructure</b>     |
| <b>67</b>  | 14 | <b>269</b> | 18 | <b>162</b> | 12 | <b>11</b>  | 13 | Frag,<br>Frag,<br>Frag,<br>Frag,<br>Frag | 152.0560,<br>153.0407,<br>110.0346,<br>135.0300,<br>55.0295 | C5H6N5O,<br>C5H5N4O2,<br>C4H4N3O,<br>C5H3N4O,<br>C2H3N2 | <b>Fragment ions indicative for guanine (C5H5N5O) based substructure</b>     |

|            |    |            |    |            |    |            |    |                                          |                                                             |                                                  |                                                                                                   |
|------------|----|------------|----|------------|----|------------|----|------------------------------------------|-------------------------------------------------------------|--------------------------------------------------|---------------------------------------------------------------------------------------------------|
| <b>195</b> | 12 | -          | -  | <b>104</b> | 5  | -          | -  | Frag,<br>Frag,<br>Frag,<br>Frag,<br>Frag | 80.0495,<br>164.0346,<br>136.0397,<br>53.0389,<br>65.0388   | C5H6N,<br>C8H6NO3,<br>C7H6NO2,<br>C4H5,<br>C5H5  | Unclear what these fragments relate to.                                                           |
| <b>181</b> | 11 | <b>2</b>   | 11 | <b>19</b>  | 11 | <b>256</b> | 10 | Frag,<br>Frag,<br>Frag,<br>Frag,<br>Frag | 177.0547,<br>145.0284,<br>89.0386,<br>117.0331,<br>149.0599 | C10H9O3,<br>C9H5O2,<br>C9H7,<br>C8H5O,<br>C9H9O2 | <b>Fragments indicative for ferulic acid based substructure (MzCloud)</b>                         |
| <b>22</b>  | 38 | <b>133</b> | 50 | <b>58</b>  | 42 | <b>185</b> | 55 | Frag,<br>Frag,<br>Frag,<br>Frag,<br>Frag | 121.0649,<br>103.0545,<br>91.0541,<br>53.0389,<br>93.0698   | C8H9O,<br>C8H7,<br>C7H7,<br>C4H5,<br>C7H9        | <b>Fragments indicative for ethylphenol substructure (i.e. resulting from Tyramine – MzCloud)</b> |
| <b>85</b>  | 37 | -          | -  | <b>69</b>  | 47 | <b>164</b> | 39 | Frag,<br>Frag,<br>Frag                   | 69.0337,<br>57.0337,<br>73.0285                             | C4H5O,<br>C3H5O,<br>C3H5O2                       | <i>Fragment ions possibly indicative for ribose substructure (MzCloud)</i>                        |
| <b>26</b>  | 31 | <b>15</b>  | 36 | <b>7</b>   | 25 | <b>37</b>  | 25 | Frag,<br>Frag                            | 104.1070,<br>60.0810                                        | C5H14NO,<br>C3H10N                               | Possibly suggests 5-aminopentanol substructure                                                    |
| <b>143</b> | 11 | -          | -  | <b>72</b>  | 5  | -          | -  | Frag,                                    | 150.0557,                                                   | C8H8NO2,                                         | Possibly suggests methoxy-1H-indole-2,3-dione                                                     |

|            |    |            |    |            |    |            |   |                                                                               |                                                                                                              |                                                                                                    |                                                                                                                                                             |
|------------|----|------------|----|------------|----|------------|---|-------------------------------------------------------------------------------|--------------------------------------------------------------------------------------------------------------|----------------------------------------------------------------------------------------------------|-------------------------------------------------------------------------------------------------------------------------------------------------------------|
|            |    |            |    |            |    |            |   | Frag,<br>Frag,<br>Frag                                                        | 178.0501,<br>95.0494,<br>135.0310                                                                            | C9H8NO3,<br>C6H7O,<br>C7H5NO2                                                                      | (methoxy-isatin) substructure                                                                                                                               |
| <b>245</b> | 12 | <b>71</b>  | 20 | <b>202</b> | 15 | <b>104</b> | 9 | Frag,<br>Frag,<br>Frag,<br>Frag,<br>Frag                                      | 118.0654,<br>117.0571,<br>91.0541,<br>130.0645<br>188.0706,                                                  | C8H8N,<br>C8H7N,<br>C7H7,<br>C9H8N,<br>C11H10NO2                                                   | <b>Fragments indicative of [tryptophan-NH3] related substructure (C8H8N is the basic indole skeleton, a fused benzene and 5 membered N-containing ring)</b> |
| <b>244</b> | 16 | <b>291</b> | 22 | -          | -  | -          | - | Loss,<br>Loss,<br>Loss,<br>Loss,<br>Loss,<br>Loss,<br>Loss,<br>Frag,<br>Frag, | 36.0183,<br>162.0525<br>138.0526,<br>196.0583,<br>150.0526,<br>64.0150,<br>184.0578,<br>112.0398,<br>87.0316 | H4O2,<br>C6H10O5,<br>C7H8NO2,<br>C6H12O7,<br>C5H10O5,<br>CH4O3,<br>C5H12O7,<br>C5H6NO2,<br>C3H5NO2 | Possibly suggests iminosugar like substructure. Losses related to sugar (polyhydroxylated structure)                                                        |
| <b>146</b> | 27 | <b>238</b> | 9  | <b>82</b>  | 28 | <b>286</b> | 8 | Frag,<br>Frag,<br>Frag,<br>Frag,                                              | 131.1292,<br>72.0809,<br>114.1028,<br>98.0600,                                                               | C5H15N4,<br>C4H10N,<br>C5H12N3,<br>C5H8NO,                                                         | Possibly suggests agmatine based substructure (C5H15N4), with unknown conjugation....                                                                       |

|            |    |            |     |                     |                             |            |    |                                                            |                                                                                                 |                                                                                |                                                                                                                                 |
|------------|----|------------|-----|---------------------|-----------------------------|------------|----|------------------------------------------------------------|-------------------------------------------------------------------------------------------------|--------------------------------------------------------------------------------|---------------------------------------------------------------------------------------------------------------------------------|
|            |    |            |     |                     |                             |            |    | Frag,<br>Frag,<br>Frag,<br>Frag                            | 60.0559,<br>157.1084,<br>278.0554,<br>207.0796                                                  | CH6N3,<br>C6H13N4O,<br>C17H14O4,<br>C15H11O                                    |                                                                                                                                 |
| <b>5</b>   | 12 | <b>126</b> | 13  | <b>68</b>           | 10                          | <b>101</b> | 7  | Frag,<br>Frag,<br>Frag,<br>Frag                            | 258.1335,<br>276.1435,<br>230.1398,<br>212.1277                                                 | C12H20NO5,<br>C12H22NO6,<br>C11H20NO4,<br>C11H18NO3                            | Possibly suggests iminosugar like substructure. Fragments have losses (H2O, CO) related to sugar (polyhydroxylated structure)   |
| <b>211</b> | 81 | <b>111</b> | 124 | <b>131,<br/>129</b> | 129<br>73<br>(huge overlap) | <b>52</b>  | 58 | Frag,<br>Frag,<br>Frag,<br>Frag,<br>Frag                   | 85.0283,<br>145.0550,<br>127.0387,<br>97.0284,<br>69.0337,<br>163.0605                          | C4H5O2,<br>C6H9O4,<br>C6H7O3,<br>C5H5O2,<br>C4H4O,<br>C6H11O5                  | <b>Fragments indicative of a [hexose-H2O] substructure – i.e., indicative for a hexose (like glucose) conjugation (MzCloud)</b> |
| <b>2</b>   | 7  | <b>113</b> | 57  | <b>102</b>          | 67                          | <b>233</b> | 46 | Frag,<br>Frag,<br>Frag,<br>Frag,<br>Frag,<br>Frag,<br>Frag | 67.0545,<br>81.0700,<br>55.0540,<br>149.1325,<br>277.2173,<br>295.2288,<br>93.0698,<br>71.0857, | C5H7,<br>C6H9,<br>C4H7,<br>C11H17<br>C18H29O2,<br>C18H31O3,<br>C7H9,<br>C5H11, | Possibly suggests alkylbenzene substructure.                                                                                    |

|            |   |            |    |            |    |                   |           |                                 |                                               |                                           |                                                                                         |
|------------|---|------------|----|------------|----|-------------------|-----------|---------------------------------|-----------------------------------------------|-------------------------------------------|-----------------------------------------------------------------------------------------|
|            |   |            |    |            |    |                   |           | Frag,<br>Frag                   | 141.1273,<br>169.1226                         | C9H17O,<br>C10H17O2                       |                                                                                         |
| <b>166</b> | 9 | <b>227</b> | 19 | <b>121</b> | 10 | <b>49</b>         | 8         | Frag,<br>Frag,<br>Frag,<br>Frag | 146.0811,<br>128.0703,<br>81.0334,<br>83.0490 | C6H12NO3,<br>C6H10NO2,<br>C5H5O,<br>C3H7O | Possibly suggests 4-aminooxane-4-carboxylic acid like substructure?                     |
| -          | - | <b>75</b>  | 14 | -          | -  | <b>46</b>         | 12        | Frag,<br>Frag,<br>Frag          | 86.0314,<br>146.0528,<br>128.0428             | N/A<br>N/A<br>N/A                         | Isotope M2M of 111 (glycoside/hexoside related)                                         |
| -          | - | <b>162</b> | 86 | <b>176</b> | 57 | <b>129</b>        | 80        | Frag                            | 91.0541                                       | C7H7                                      | <i>Small abundant and generic aromatic fragment found across several mass patterns.</i> |
| -          | - | <b>240</b> | 59 | <b>290</b> | 69 | <b>191</b>        | 72        | Frag,<br>Frag                   | 69.0701,<br>53.0026                           | C5H9,<br>C3HO                             | Two small fragments, unclear if they represent a substructure                           |
| -          | - | <b>217</b> | 29 | -          | -  | -                 | -         | Loss                            | 35.0343<br>(35.0366!)                         | H5NO                                      | <b><i>Combined (sequential) H2O and NH3 loss</i></b>                                    |
| <b>184</b> | 9 | <b>36</b>  | 13 | <b>207</b> | 13 | <b>116</b>        | 17        | Frag,<br>Frag                   | 152.0703,<br>134.0600                         | C8H10NO2,<br>C8H8NO                       | Unclear what these fragments relate to.                                                 |
| -          | - | <b>88</b>  | 62 | <b>221</b> | 42 | <b>263,<br/>0</b> | 68,<br>13 | Frag,<br>Frag,<br>Frag,<br>Frag | 57.0701,<br>85.0648,<br>67.0546,<br>53.0026   | C4H9,<br>C5H9O,<br>C5H7,<br>C3HO          | Unclear yet what these fragments relate to.                                             |
| -          | - | <b>260</b> | 29 | <b>233</b> | 16 | <b>137</b>        | 18        | Loss,                           | 64.0161,                                      | CH4O3,                                    | Combination of small losses                                                             |

|           |    |            |    |            |    |            |    |                                 |                                              |                                            |                                                                                                                                                                                            |
|-----------|----|------------|----|------------|----|------------|----|---------------------------------|----------------------------------------------|--------------------------------------------|--------------------------------------------------------------------------------------------------------------------------------------------------------------------------------------------|
|           |    |            |    |            |    |            |    | Loss                            | 92.0108                                      | C2H4O4                                     | (CO2, H2O, etc.) – Unclear if they relate to a substructure loss.                                                                                                                          |
| -         | -  | <b>134</b> | 18 | <b>222</b> | 11 | -          | -  | Frag,<br>Frag,<br>Frag,<br>Loss | 60.0448,<br>106.0497,<br>88.0392<br>115.0268 | C2H6NO,<br>C3H8NO3,<br>C3H6NO2,<br>C4H5NO3 | <b>Fragments (and loss) indicative for serine substructure (MzCloud) - Present in Beer 2 &amp; Beer 3</b>                                                                                  |
| -         | -  | <b>243</b> | 16 | -          | -  | -          | -  | Loss,<br>Loss                   | 143.0580,<br>99.0682                         | C6H9NO3,<br>C5H9NO                         | Unclear what these fragments relate to.                                                                                                                                                    |
| -         | -  | <b>187</b> | 30 | <b>230</b> | 31 | -          | -  | Frag,<br>Loss,<br>Frag,<br>Frag | 87.0439,<br>86.0366,<br>104.0711,<br>69.0337 | C4H7O2,<br>C4H6O2,<br>C4H10NO2,<br>C4H5O   | <b>Fragments indicative for <math>\gamma</math>-aminobutyric acid (amimobutyrate) substructure (MzCloud) – present in Beer 2 &amp; Beer 3 – in beer 3 mainly based on C4H7O2 fragment.</b> |
| <b>93</b> | 34 | <b>259</b> | 41 | <b>12</b>  | 44 | <b>229</b> | 32 | Loss,<br>Loss,<br>Loss,<br>Loss | 27.9941,<br>30.0100<br>55.9897,<br>54.0102   | CO,<br>CH2O<br>C2O2,<br>C3H2O              | Combination of small losses (CO2, H2O, etc.) – Unclear if they relate to a substructure loss.                                                                                              |
| -         | -  | <b>10</b>  | 32 | <b>227</b> | 29 | <b>151</b> | 53 | Frag,<br>Frag,<br>Frag          | 111.0443,<br>83.0490,<br>55.0547             | C6H7O2,<br>C5H7O,<br>C4H7                  | Possibly related to 1,4-Cyclohex-2-enedione substructure – double CO loss between fragments. Could be alkaloid fragments as well.                                                          |
| <b>62</b> | 13 | <b>66</b>  | 24 | <b>136</b> | 19 | <b>66</b>  | 15 | Frag,<br>Frag                   | 95.0607,<br>68.0498                          | C5H7N2,<br>C4H6N                           | Unclear what these fragments relate to. Possibly small ring                                                                                                                                |

|            |           |            |           |            |           |           |           |                                          |                                                             |                                                  |                                                                                                   |
|------------|-----------|------------|-----------|------------|-----------|-----------|-----------|------------------------------------------|-------------------------------------------------------------|--------------------------------------------------|---------------------------------------------------------------------------------------------------|
|            |           |            |           |            |           |           |           |                                          |                                                             |                                                  | structure (CHN loss)                                                                              |
| <b>107</b> | <b>9</b>  | <b>263</b> | <b>16</b> | <b>-</b>   | <b>-</b>  | <b>-</b>  | <b>-</b>  | Frag,<br>Loss,<br>Loss,<br>Frag          | 128.1074,<br>60.0576,<br>42.0470,<br>110.0970               | C7H14NO<br>C2H4O2,<br>C2H2O,<br>C7H12N           | Unclear what these fragments relate to.                                                           |
| <b>6</b>   | <b>6</b>  | <b>290</b> | <b>11</b> | <b>67</b>  | <b>3</b>  | <b>67</b> | <b>5</b>  | Frag,<br>Frag,<br>Frag,<br>Frag          | 68.9972,<br>111.0076,<br>129.0186,<br>157.0131              | C3HO2,<br>C5H3O3,<br>C5H5O4,<br>C6H5O5           | <b>Fragment ions indicative for aconitic acid substructure (C3HO2 fragment is quite specific)</b> |
| <b>-</b>   | <b>-</b>  | <b>224</b> | <b>10</b> | <b>-</b>   | <b>-</b>  | <b>71</b> | <b>10</b> | Loss,<br>Loss                            | 53.0476,<br>71.0583                                         | NH7O2,<br>NH9O3                                  | Combination of small losses (NH3, H2O) – Unclear if they relate to a substructure loss.           |
| <b>-</b>   | <b>-</b>  | <b>153</b> | <b>19</b> | <b>294</b> | <b>11</b> | <b>-</b>  | <b>-</b>  | Frag,<br>Frag                            | 180.1013,<br>162.0915                                       | C10H14NO3,<br>C10H12NO2                          | Unclear what these fragments relate to.                                                           |
| <b>281</b> | <b>9</b>  | <b>77</b>  | <b>10</b> | <b>249</b> | <b>12</b> | <b>26</b> | <b>11</b> | Frag,<br>Frag,<br>Frag,<br>Frag          | 138.0545,<br>140.1065,<br>186.0758,<br>168.0650             | C7H8NO2,<br>C7H10NO2,<br>C8H12NO4,<br>C8H10NO3   | Unclear yet what these fragments relate to.                                                       |
| <b>125</b> | <b>13</b> | <b>246</b> | <b>18</b> | <b>17</b>  | <b>6</b>  | <b>8</b>  | <b>10</b> | Frag,<br>Frag,<br>Frag,<br>Frag,<br>Frag | 136.0760,<br>107.0493,<br>91.0543,<br>95.0494,<br>123.0447, | C8H10NO,<br>C7H7O,<br>C7H7,<br>C6H7O,<br>C7H7O2, | <b>Fragments indicative for tyrosine substructure (MzCloud)</b>                                   |

|            |    |            |    |            |    |            |    |                                          |                                                             |                                                              |                                                             |
|------------|----|------------|----|------------|----|------------|----|------------------------------------------|-------------------------------------------------------------|--------------------------------------------------------------|-------------------------------------------------------------|
|            |    |            |    |            |    |            |    | Frag,<br>Frag                            | 119.0488,<br>182.0822                                       | C8H7O,<br>C9H12NO3                                           |                                                             |
| <b>228</b> | 5  | <b>200</b> | 10 | <b>4</b>   | 6  | <b>121</b> | 11 | Frag,<br>Frag,<br>Frag,<br>Frag          | 260.1117,<br>128.0704,<br>242.1011,<br>100.0754             | C11H18NO6,<br>C6H10NO2,<br>C11H16NO5,<br>C5H10NO             | Unclear yet what these fragments relate to.                 |
| -          | -  | <b>173</b> | 25 | <b>41</b>  | 32 | <b>128</b> | 5  | Frag,<br>Frag,<br>Frag,<br>Frag,<br>Frag | 130.0506,<br>97.0284,<br>238.0714,<br>226.0718,<br>274.0920 | C5H8NO3,<br>C5H5O2,<br>C11H12NO5,<br>C10H12NO5,<br>C11H16NO7 | Unclear yet what these fragments relate to.                 |
| -          | -  | <b>254</b> | 15 | <b>188</b> | 10 | <b>42</b>  | 14 | Frag,<br>Frag,<br>Frag,<br>Frag          | 73.0285,<br>133.0499,<br>57.0337,<br>115.0391               | C3H5O2,<br>C5H9O4,<br>C3H5O,<br>C5H7O3                       | Unclear yet – possibly related to methylsuccinic acid....   |
| -          | -  | -          | -  | <b>128</b> | 15 | -          | -  | Loss                                     | 42.0107                                                     | C2H2O                                                        | N/O-Acetylation (Beer 3)                                    |
| <b>197</b> | 14 | <b>67</b>  | 22 | <b>250</b> | 22 | -          | -  | Loss,<br>Loss,<br>Loss                   | 63.0319,<br>45.0578,<br>91.0268                             | CH5NO2,<br>C2H7N,<br>C2H5NO3                                 | Combination of small losses (i.e., NH3 and CH2O2)           |
| -          | -  | <b>96</b>  | 18 | <b>272</b> | 12 | <b>199</b> | 14 | Frag,<br>Frag                            | 74.0598,<br>56.0497                                         | C3H8NO,<br>C3H6N                                             | Unclear if fragments relate to a specific substructure.     |
| -          | -  | <b>78</b>  | 14 | <b>291</b> | 22 | <b>173</b> | 12 | Frag,                                    | 55.0547,                                                    | C4H7,                                                        | Unclear if fragments relate to a specific substructure. H2O |



|            |           |            |           |                           |           |            |           |                                                   |                                                                       |                                                                     |                                                                                                                                                                                                    |
|------------|-----------|------------|-----------|---------------------------|-----------|------------|-----------|---------------------------------------------------|-----------------------------------------------------------------------|---------------------------------------------------------------------|----------------------------------------------------------------------------------------------------------------------------------------------------------------------------------------------------|
|            |           |            |           |                           |           |            |           | Frag                                              | 73.0647                                                               | C4H9O                                                               | loss between fragments.                                                                                                                                                                            |
| -          | -         | -          | -         | <b>139,</b><br><b>180</b> | 20,<br>10 | <b>132</b> | 15        | Frag,<br>Frag,<br>Frag,<br>Frag                   | 89.0600,<br>133.0863,<br>177.1128,<br>111.0443                        | C4H9O2,<br>C6H13O3,<br>C8H17O4,<br>C6H7O2                           | Unclear yet what these fragments relate to.                                                                                                                                                        |
| <b>286</b> | <b>6</b>  | <b>145</b> | <b>9</b>  | <b>42</b>                 | <b>17</b> | <b>-</b>   | <b>-</b>  | Frag,<br>Frag,<br>Frag,<br>Frag,<br>Frag,<br>Frag | 74.0235,<br>88.0392,<br>70.0290,<br>87.0554,<br>133.0615,<br>116.0344 | C2H4NO2,<br>C3H6NO2,<br>C3H4NO,<br>C3H7N2O,<br>C4H9N2O3,<br>C4H6NO3 | <b>Fragments indicative for asparagine substructure (MzCloud) – prevalent in Beer 3</b>                                                                                                            |
| <b>7</b>   | <b>10</b> | <b>165</b> | <b>24</b> | <b>91</b>                 | <b>14</b> | <b>84</b>  | <b>34</b> | Frag,<br>Frag,<br>Frag                            | 108.0443,<br>80.0495,<br>53.0389                                      | C6H6NO,<br>C5H6N,<br>C4H5                                           | Fragments possibly suggest benzene ring substituted with one hydroxyl and one NH2 group (fragments point to orientation from 3-hydroxyanthranilic acid – i.e. MzCloud) – prevalent in Beer 2 and 4 |
| <b>124</b> | <b>7</b>  | <b>4</b>   | <b>19</b> | <b>166</b>                | <b>10</b> | <b>78</b>  | <b>6</b>  | Frag,<br>Frag,<br>Frag                            | 126.0665,<br>109.03976,<br>108.0560                                   | C5H8N3O,<br>C5H5N2O,<br>C5H6N3                                      | <b>Fragment ions indicative for 5-methylcytosine substructure (MzCloud) – prevalent in Beer 2</b>                                                                                                  |
| <b>130</b> | <b>11</b> | <b>29</b>  | <b>18</b> | <b>211</b>                | <b>24</b> | <b>181</b> | <b>17</b> | Loss,<br>Frag,<br>Frag,                           | 59.0370,<br>114.0912,<br>72.0447,                                     | C2H5NO,<br>C6H12NO,<br>C3H6NO,                                      | <b>Fragment ions indicative for N-acetylputrescine substructure (MzCloud)</b>                                                                                                                      |

|            |    |            |    |            |    |            |    |                        |                                     |                                |                                                                                                         |
|------------|----|------------|----|------------|----|------------|----|------------------------|-------------------------------------|--------------------------------|---------------------------------------------------------------------------------------------------------|
|            |    |            |    |            |    |            |    | Frag                   | 60.0448                             | C2H6NO                         |                                                                                                         |
| -          | -  | <b>92</b>  | 27 | <b>156</b> | 22 | <b>99</b>  | 36 | Loss                   | 132.0421                            | C5H8O4                         | <i>[Ribose (pentose, C5-sugar)-H2O] related loss – indicative for conjugated ribose sugar - EF fits</i> |
| <b>201</b> | 9  | <b>185</b> | 8  | <b>270</b> | 8  | <b>246</b> | 12 | Frag,<br>Frag,<br>Frag | 206.1024,<br>86.0602,<br>74.0600    | C8H16NO5,<br>C4H8NO,<br>C3H8NO | Unclear yet what these fragments relate to.                                                             |
| <b>77</b>  | 10 | <b>135</b> | 16 | <b>23</b>  | 16 | <b>244</b> | 18 | Loss,<br>Loss,<br>Loss | 144.04192,<br>190.0474,<br>160.0370 | C6H8O4,<br>C7H10O6,<br>C6H8O5  | Unclear yet what these losses relate to.                                                                |
| -          | -  | <b>13</b>  | 10 | -          | -  | <b>282</b> | 14 | Frag,<br>Frag          | 126.0600,<br>94.0648                | C7H8NO,<br>C6H8N               | Unclear yet what these fragments relate to.                                                             |
| -          | -  | -          | -  | <b>35</b>  | 11 | <b>161</b> | 18 | Frag,<br>Frag          | 95.0494,<br>137.0600                | C6H7O,<br>C8H9O2               | Unclear yet what these fragments relate to.                                                             |

Table S-5. Table with Mass2Motifs (MSMs) discover in the four negative ionization mode fragmentation files of the beer extracts.

Table with M2Ms in four beers – fragments/losses associated to the M2Ms can slightly differ in between beers due to degree and type of metabolites associated to the M2M. Experimental masses are within 5 ppm of theoretical masses as found in topics. Slight changes are observed per file. Annotated Mass2Motifs: Bold represents highest level of confidence (i.e., several fragments or specific mass value that can only point to a certain combination of ions), bold and italic is second-highest level of confidence (i.e., match on elemental formula (EF) only – but in the given sample matrix it is quite a likely structural annotation), just italic is the third-highest level of confidence (i.e., no specific structure found, often generic fragments that have multiple possible structural confirmations), and plain text represents the lowest level of confidence.

| Beer1      | Beer2  | Beer3      | Beer4  |            |        |            |        | Frag/<br>Loss | m/z      | EF     | Characterization                                                                                                                                      |
|------------|--------|------------|--------|------------|--------|------------|--------|---------------|----------|--------|-------------------------------------------------------------------------------------------------------------------------------------------------------|
| M2M        | Degree | M2M        | Degree | M2M        | Degree | M2M        | Degree |               |          |        |                                                                                                                                                       |
| <b>0</b>   | 161    | <b>198</b> | 108    | <b>74</b>  | 156    | <b>84</b>  | 126    | Frag          | 71.0135  | C3H3O2 | <i>Fragment ion related to 3-hydroxy-carboxylic acid substructure (C=C=O coupled to C-O[-]) - EF fits</i>                                             |
| <b>147</b> | 83     | <b>133</b> | 31     | <b>158</b> | 49     | <b>104</b> | 41     | Frag          | 101.0248 | C4H5O3 | <i>2-oxo-butyric acid (2-oxo-butyrate) fragment - EF fits</i>                                                                                         |
| <b>86</b>  | 84     | <b>205</b> | 90     | <b>75</b>  | 68     | <b>25</b>  | 73     | Loss          | 43.9898  | CO2    | <b>Loss of carboxylic acid group - suggests free CO2 group (for example in underivatized amino acid)</b>                                              |
| <b>287</b> | 66     | <b>48</b>  | 68     | <b>273</b> | 67     | <b>281</b> | 44     | Frag          | 85.0295  | C4H5O2 | <i>Fragment related to small organic acid - usually contains carboxylic acid group with (branched/unbranched) 3-carbon alkylchain attached to it.</i> |
| <b>116</b> | 66     | <b>240</b> | 81     | <b>50</b>  | 71     | <b>253</b> | 49     | Frag          | 78.9593  | PO3    | <b>Fragment of phosphonate - indicates phosphate</b>                                                                                                  |

|     |     |     |    |     |    |     |    |      |          |         | substructure                                                                                                         |
|-----|-----|-----|----|-----|----|-----|----|------|----------|---------|----------------------------------------------------------------------------------------------------------------------|
| 233 | 56  | 284 | 59 | 180 | 49 | 273 | 32 | Frag | 59.0133  | C2H3O2  | <i>Fragment consisting of aldehyde and hydroxyl group - common structural motif in sugar fragmentation - EF fits</i> |
| 54  | 54  | -   | -  | -   | -  | -   | -  | Frag | 80.9649  | HSO3    | <b>Fragment of sulphate anion, fragmented from aliphatic chain -</b><br><br><b>Only present in Beer 1</b>            |
| 137 | 137 | 184 | 43 | 292 | 34 | 105 | 30 | Loss | 162.0529 | C6H10O5 | <b>Loss of [hexose-H2O] - indication of hexose conjugation (for example glucose)</b>                                 |
| 257 | 40  | 157 | 48 | 82  | 48 | 9   | 39 | Loss | 18.0094  | H2O     | <b>Loss of water molecule (H2O) - indication of free hydroxyl group</b>                                              |
| 5   | 36  | 50  | 40 | 47  | 23 | 74  | 33 | Loss | 62.0005  | CH2O3   | <i>Combined loss of CO2 and H2O, possibly suggests two carboxylic acid groups in the fragmented metabolite</i>       |
| 156 | 25  | 30  | 18 | 201 | 26 | 133 | 14 | Loss | 72.0212  | C3H4O2  | Loss possibly indicative of carboxylic acid group with 2-carbon alkyl chain attached.                                |
| 230 | 23  | 259 | 17 | 246 | 20 | 196 | 17 | Loss | 60.0210  | C2H4O2  | Loss possibly indicative of carboxylic acid group with 1 carbon attached.                                            |
| 163 | 23  | 28  | 24 | 145 | 12 | 43  | 28 | Frag | 87.0086  | C3H3O3  | <i>Fragment related to pyruvic acid (pyruvate) or oxaloacetate - EF fits</i>                                         |

|            |    |            |    |            |    |                                        |              |               |                       |                     |                                                                                                    |
|------------|----|------------|----|------------|----|----------------------------------------|--------------|---------------|-----------------------|---------------------|----------------------------------------------------------------------------------------------------|
| <b>111</b> | 22 | <b>263</b> | 21 | <b>162</b> | 22 | <b>60</b>                              | 18           | Loss          | 90.0318               | C3H6O3              | <i>Loss related to lactic acid (lactate) - EF fits</i>                                             |
| <b>65</b>  | 20 | <b>108</b> | 14 | <b>256</b> | 11 | <b>158</b>                             | 12           | Loss          | 71.9849               | C2O3                | <i>CO2 loss and CO loss combined – not clear if this points to a substructure</i>                  |
| <b>63</b>  | 19 | <b>110</b> | 19 | <b>13</b>  | 16 | <b>121</b>                             | 13           | Loss          | 116.0111              | C4H4O4              | <i>Loss possibly indicative of fumaric acid (fumarate) - EF fits</i>                               |
| <b>72</b>  | 20 | <b>297</b> | 15 | <b>88</b>  | 24 | <b>69</b>                              | 29           | Frag          | 60.9927               | CHO3                | <i>Bicarbonate fragment - possibly related to small oxygen rich organic acids</i>                  |
| <b>195</b> | 15 | -          | -  | <b>113</b> | 9  | -                                      | -            | Frag          | 69.0343               | C4H5O               | <i>Fragment ion indicative for carboxylic acid group with a 3-carbon alkyl chain attached.</i>     |
| <b>286</b> | 13 | <b>83</b>  | 21 | <b>184</b> | 11 | <b>183</b>                             | 14           | Frag,<br>Loss | 114.0558,<br>115.0637 | C5H8NO2,<br>C5H9NO2 | <i>Fragment and loss related to proline substructure - EF fits</i>                                 |
| <b>38</b>  | 6  | <b>79</b>  | 18 | <b>54</b>  | 20 | <b>72</b>                              | 19           | Loss          | 46.0057               | CH2O2               | <i>Combined losses of H2O and CO - not sure if this relates to a particular structural feature</i> |
| <b>6</b>   | 67 | <b>131</b> | 8  | <b>216</b> | 11 | <b>264</b>                             | 8            | Frag,<br>Frag | 79.9575               | SO3                 | <b>Fragment of sulphate ion, fragmented from aromatic structure</b>                                |
| <b>167</b> | 53 | <b>228</b> | 54 | <b>101</b> | 45 | <b>148</b><br><b>and</b><br><b>221</b> | 29<br><br>11 | Frag          | 89.0249,<br>71.0136   | C3H5O3,<br>C3H3O2   | <b>Fragments indicating lactic acid (lactate) substructure (MzCloud)</b>                           |
| <b>141</b> | 43 | <b>85</b>  | 44 | <b>56</b>  | 40 | <b>151</b>                             | 27           | Frag          | 128.0358              | C5H6NO3             | <i>Generic fragment - unclear if any specific substructure is related</i>                          |

|     |    |     |    |     |    |     |    |               |                       |                    |                                                                                                                                                                     |
|-----|----|-----|----|-----|----|-----|----|---------------|-----------------------|--------------------|---------------------------------------------------------------------------------------------------------------------------------------------------------------------|
| 178 | 36 | 226 | 42 | 105 | 35 | 118 | 33 | Frag          | 88.0407               | C3H6NO2            | <i>Fragment ion indicating alanine substructure - EF fits</i>                                                                                                       |
| 139 | 34 | 21  | 48 | 284 | 30 | 67  | 23 | Frag,<br>Frag | 94.0301,<br>66.0346   | C5H4NO,<br>C4H4N   | <i>Fragments related to nicotinic acid (nicotinate) substructure - MzCloud</i>                                                                                      |
| 152 | 32 | 298 | 24 | 32  | 37 | 296 | 37 | Frag          | 72.9928               | C2HO3              | <b>Fragment related to 2-hydroxycarboxylic acid related substructure - indicative for a carboxylic acid group with one carbon attached bearing a hydroxyl group</b> |
| 297 | 23 | 71  | 24 | 254 | 28 | 194 | 20 | Frag          | 75.0085               | C2H3O3             | <i>Fragment related to 2-hydroxyethanoic acid substructure - MzCloud</i>                                                                                            |
| 255 | 21 | 98  | 32 | 164 | 26 | 92  | 14 | Loss          | 180.0655              | C6H12O6            | <i>Loss possibly indicating hydrated hexose loss</i>                                                                                                                |
| 217 | 19 | 3   | 10 | 168 | 17 | 298 | 19 | Loss          | 27.9945               | CO                 | <b>Loss of C=O - small loss, unclear what it points to in negative ionization mode</b>                                                                              |
| 214 | 11 | 277 | 13 | 130 | 21 | 3   | 5  | Loss          | 129.0428              | C5H7NO3            | Loss possibly related to pyroglutamic acid (pyroglutamate) - EF fits                                                                                                |
| 42  | 33 | -   | -  | -   | -  | -   | -  | Frag,<br>Frag | 179.0572,<br>161.0465 | C6H11O6,<br>C6H9O5 | <i>Fragments suggesting hexose substructure - EF fits - in Beer1 only</i>                                                                                           |
| 271 | 28 | 215 | 24 | 62  | 28 | 101 | 14 | Frag          | 74.0245               | C2H4NO2            | <i>Glycine related fragment - EF fits</i>                                                                                                                           |
| 284 | 26 | 213 | 18 | 174 | 22 | 131 | 16 | Frag          | 73.0294               | C3H5O2             | <i>Fragment indicative for ethylcarboxylate substructure</i>                                                                                                        |

|            |    |            |    |            |    |            |    |                                 |                                              |                                        |  | <i>- MzCloud</i>                                                                                                                                                      |
|------------|----|------------|----|------------|----|------------|----|---------------------------------|----------------------------------------------|----------------------------------------|--|-----------------------------------------------------------------------------------------------------------------------------------------------------------------------|
| <b>128</b> | 27 | <b>156</b> | 56 | <b>225</b> | 23 | <b>98</b>  | 16 | Frag                            | 130.0881                                     | C6H12NO2                               |  | <i>Fragment indicative of leucine substructure - EF fits - MzCloud</i>                                                                                                |
| <b>298</b> | 15 | <b>38</b>  | 11 | <b>21</b>  | 13 | <b>227</b> | 13 | Loss                            | 87.9797                                      | C2O4                                   |  | <b>Loss of two CO2 molecules – indicative for two free carboxylic acid groups</b>                                                                                     |
| <b>254</b> | 16 | <b>54</b>  | 11 | <b>288</b> | 8  | <b>252</b> | 13 | Loss                            | 132.0423                                     | C5H8O4                                 |  | <i>Loss indicating [pentose (C5-sugar)-H2O] loss - indicative for conjugated pentose sugar - EF fits</i>                                                              |
| <b>36</b>  | 12 | <b>199</b> | 14 | <b>161</b> | 18 | <b>146</b> | 12 | Frag                            | 102.0564                                     | C4H8NO2                                |  | Fragment possibly suggesting aminobutyric acid (aminobutyrate) substructure                                                                                           |
| <b>119</b> | 33 | -          | -  | -          | -  | <b>214</b> | 14 | Frag,<br>Frag,<br>Frag,<br>Frag | 72.9928,<br>59.0134,<br>119.0348,<br>91.0404 | C2HO3,<br>C2H3O2,<br>C4H7O4,<br>C3H7O3 |  | <i>Fragments possibly related to threose substructure</i>                                                                                                             |
| <b>76</b>  | 16 | <b>174</b> | 17 | <b>237</b> | 12 | <b>162</b> | 12 | Frag                            | 127.0510                                     | C5H7N2O2                               |  | <i>Fragment indicative of glutamine substructure - EF fits with [glutamine-COOH]</i>                                                                                  |
| <b>129</b> | 15 | <b>195</b> | 17 | <b>187</b> | 12 | <b>73</b>  | 4  | Loss,<br>Loss                   | 120.0423,<br>108.0425                        | C4H8O4,<br>C3H8O4                      |  | Losses possibly related to small sugar like threose                                                                                                                   |
| <b>1</b>   | 7  | <b>229</b> | 6  | <b>120</b> | 16 | <b>123</b> | 5  | Frag,<br>Frag,<br>Frag          | 545.1700,<br>383.1197,<br>221.0656,          | C8H13O7,                               |  | <i>Fragments related to polysaccharides - this mass2motif contains doubly charged species - it is unclear whether that points to a specific structural feature of</i> |

|            |    |            |    |            |    |                                      |    |                                                   |                                                                          |                                                                  |                                                                                                                                                                                                    |
|------------|----|------------|----|------------|----|--------------------------------------|----|---------------------------------------------------|--------------------------------------------------------------------------|------------------------------------------------------------------|----------------------------------------------------------------------------------------------------------------------------------------------------------------------------------------------------|
|            |    |            |    |            |    |                                      |    | Frag,<br>Frag                                     | 1031.3366,<br>161.0448                                                   | C6H9O5                                                           | <i>the polysaccharide structure</i>                                                                                                                                                                |
| <b>69</b>  | 17 | <b>90</b>  | 14 | <b>136</b> | 17 | <b>192</b>                           | 19 | Frag,<br>Frag,<br>Frag,<br>Frag                   | 383.1197,<br>161.0439,<br>545.1700,<br>221.0684                          | C6H9O5<br><br>C8H13O7                                            | <i>Fragments related to polysaccharides - this mass2motif contains singly charged species - it is unclear whether that points to a specific structural feature of the polysaccharide structure</i> |
| <b>1</b>   | 7  | <b>14</b>  | 14 | <b>291</b> | 11 | -                                    | -  | Frag,<br>Frag,<br>Frag,<br>Frag,<br>Frag          | 221.0684,<br>179.0571,<br>161.0464,<br>119.0348,<br>85.0294              | C8H13O7,<br>C6H11O6,<br>C6H9O5,<br>C4H7O4,<br>C5H5O2             | <i>Fragments related to polysaccharides - this mass2motif contains just the smaller m/z fragments with C8H13O7 as largest fragment, indicative for a disaccharide</i>                              |
| <b>226</b> | 9  | <b>115</b> | 13 | <b>95</b>  | 6  | <b>235</b>                           | 7  | Frag,<br>Frag,<br>Frag,<br>Frag,<br>Frag,<br>Frag | 150.0420,<br>133.0157,<br>126.0316,<br>151.0472,<br>66.0097,<br>108.0209 | C5H4N5O,<br>C5HN4O,<br>C4H4N3O2,<br>C2H7N4O4<br>C2N3,<br>C4H2N3O | <b>Fragments indicative for guanine (C5H4N5O) substructure – (MzCloud)</b>                                                                                                                         |
| <b>25</b>  | 7  | <b>275</b> | 28 | <b>199</b> | 12 | <b>33</b><br>(no 93<br>Fragme<br>nt) | 9  | Frag,<br>Frag,<br>Frag,<br>Loss,                  | 93.0349,<br>191.0560,<br>173.0456,<br>174.0532,                          | C6H5O,<br>C7H11O6,<br>C7H9O5,<br>C7H10O5,                        | <b>Fragments indicative for caffeoylquinic acid like metabolites - prevalent in Beer 2</b>                                                                                                         |



|            |    |            |    |            |    |            |    |               |                       |                   |                                                                                                     |
|------------|----|------------|----|------------|----|------------|----|---------------|-----------------------|-------------------|-----------------------------------------------------------------------------------------------------|
|            |    |            |    |            |    |            |    | Frag          | 137.0616              | C7H5O3            |                                                                                                     |
| <b>202</b> | 7  | <b>230</b> | 8  | -          | -  | -          | -  | Frag          | 125.0365              | C5H5N2O2          | Fragment possibly suggests imidazoleacetic acid substructure – EF fits                              |
| -          | -  | <b>180</b> | 15 | <b>191</b> | 20 | -          | -  | Frag,<br>Frag | 97.0296,<br>69.0343   | C5H5O2,<br>C4H5O  | <i>Fragments indicative for polyhydroxylated benzene ring (e.g. pyrogallol)</i>                     |
| -          | -  | <b>239</b> | 19 | <b>128</b> | 35 | <b>18</b>  | 23 | Frag          | 161.0464              | C6H9O5            | Fragment related to hexose - unclear if it points to specific structural feature                    |
| -          | -  | <b>258</b> | 9  | <b>271</b> | 18 | -          | -  | Frag          | 179.0572              | C6H11O6           | Fragment related to hexose - unclear if it points to specific structural feature                    |
| <b>9</b>   | 12 | <b>144</b> | 12 | <b>287</b> | 12 | <b>245</b> | 5  | Frag,<br>Frag | 111.0084,<br>173.0090 | C5H3O3,<br>C6H6O6 | <b>Fragments indicative for citric acid (citrate) substructure - (MzCloud)</b>                      |
| <b>132</b> | 16 | <b>123</b> | 31 | <b>2</b>   | 14 | <b>41</b>  | 46 | Frag          | 125.0605              | C7H9O2            | Fragment unclear yet what this points to - predominant in Beer 2 and 4.                             |
| -          | -  | <b>288</b> | 17 | <b>106</b> | 16 | <b>229</b> | 21 | Frag          | 111.0451              | C6H7O2            | <i>Fragment possibly indicative for carboxylic acid group with a 5-carbon alkyl chain attached.</i> |
| <b>58</b>  | 14 | <b>181</b> | 16 | <b>193</b> | 14 | <b>271</b> | 14 | Loss          | 42.0103               | C2H2O             | <b>Loss of acetyl group - indicative for the conjugation of acetic acid.</b>                        |
| <b>220</b> | 12 | <b>148</b> | 10 | <b>226</b> | 13 | <b>202</b> | 25 | Frag,<br>Frag | 59.9849,<br>56.9952   | CO3,<br>??!!      | Fragment possibly representing bicarbonate anion - unclear if this points to a                      |

|    |    |     |    |                 |        |     |    |                        |                                  |                              | structural feature                                                                                                                           |
|----|----|-----|----|-----------------|--------|-----|----|------------------------|----------------------------------|------------------------------|----------------------------------------------------------------------------------------------------------------------------------------------|
| 3  | 15 | 219 | 13 | 87<br>And<br>99 | 5<br>8 | 66  | 10 | Frag,<br>Frag          | 164.0716,<br>147.0452            | C9H11NO2,<br>C9H8O2          | <b>Fragments indicative to phenylalanine substructure</b>                                                                                    |
| 34 | 11 | 65  | 13 | 140             | 16     | 38  | 18 | Frag                   | 119.0508                         | C8H7O                        | <i>Fragment possibly suggests hydroxyphenylethylene substructure</i>                                                                         |
| -  | -  | -   | -  | 133             | 14     | 297 | 12 | Frag,<br>Frag,<br>Frag | 124.0400,<br>94.0301,<br>66.0346 | C6H6NO2,<br>C5H4NO,<br>C4H4N | Fragments unclear yet to which substructure they relate - related to nicotinate substructure fragments                                       |
| 7  | 9  | 3   | 7  | 2               | 12     | 86  | 9  | Frag,<br>Frag          | 96.9599,<br>79.9575              | HSO4,<br>SO3                 | <i>Fragments indicative for sulphate group substructure - unclear if there is a specific configuration that results in the HSO4 fragment</i> |

## S2.2 Feature Extraction in the MS2LDA Workflow

All fragmentation files from the four Beers, including fragmentation files of the pooled beer sample, were run through the Data Conversion part of MS2LDA. Here, we explored three alternative methods for linking MS2 spectra to MS1 peaks that were picked by XCMS after the Peak Detection step in the MS2LDA workflow. These three methods, labelled by their numbers in the list below, can be described as follows:

1. This method uses an XCMS function (`xcmsFragments`) on the same fragmentation file for both MS1 peak picking and finding correspondent MS2 spectra.
2. This method is based on a modified `xcmsFragments` script that uses both a full scan file for MS1 peak picking and a separate fragmentation file for finding correspondent MS2 spectra.
3. This method is similar to method 2 in that it uses two separate full-scan and fragmentation files for the MS1 peak picking and finding correspondent MS2 spectra, but it is based on the RMassBank scripts for MS1-MS2 pairing (2).

Method 3 was also tested using different sources of fragmentation spectra, namely from the pooled beer sample run with the combined fragmentation mode, and the separate fragmentation mode, as well as from the corresponding sample, in both fragmentation modes.

The following Table S-6 shows the number of mass features extracted by XCMS and number of unique MS1-MS2 pairs (picked MS1 peaks that were fragmented at least once during the fragmentation run) found for the eight files used in the study and for the different MS1-M2 pairing methods. Table S-3 also shows that using method 3 and the fragmented sample (in ‘Separate Fragmentation Mode’, i.e., using one ionization mode) as source of fragmentation spectra, half of the detected features above 3E5 cts have an MS2 spectrum matched.

|          | XCMS - total MS1 features above 3E5 cts | Total MS2 spectra within RT window 3-21min | Unique MS1-MS2 pairs Meth 1 | Unique MS1-MS2 pairs Meth 2 | Unique MS1-MS2 pairs Meth 3 Pooled Combined | Unique MS1-MS2 pairs Meth 3 Pooled Separate | Unique MS1-MS2 pairs Meth 3 Sample Combined | Unique MS1-MS2 pairs Meth 3 Sample Separate |
|----------|-----------------------------------------|--------------------------------------------|-----------------------------|-----------------------------|---------------------------------------------|---------------------------------------------|---------------------------------------------|---------------------------------------------|
| Beer1POS | 3136                                    | 5474                                       | 700                         | 933                         | 817                                         | 1297                                        | 878                                         | 1282                                        |
| Beer2POS | 3439                                    | 5499                                       | 808                         | 1107                        | 858                                         | 1403                                        | 818                                         | 1567                                        |
| Beer3POS | 3268                                    | 5457                                       | 737                         | 999                         | 835                                         | 1320                                        | 832                                         | 1422                                        |
| Beer4POS | 3222                                    | 5189                                       | 707                         | 1004                        | 764                                         | 1255                                        | 820                                         | 1363                                        |
| Beer1NEG | 1980                                    | 4540                                       | 349                         | 459                         | 555                                         | 752                                         | 620                                         | 1178                                        |
| Beer2NEG | 2082                                    | 4486                                       | 423                         | 466                         | 568                                         | 789                                         | 591                                         | 1178                                        |
| Beer3NEG | 1932                                    | 4335                                       | 394                         | 492                         | 532                                         | 704                                         | 532                                         | 1126                                        |
| Beer4NEG | 1807                                    | 4242                                       | 382                         | 428                         | 492                                         | 705                                         | 544                                         | 1018                                        |

Table S-6. Number of mass features extracted by XCMS and number of unique MS1-MS2 pairs (picked MS1 peaks that were fragmented at least once during the fragmentation run) found for the eight files used in the study and for the different MS1-M2 pairing methods.

## S2.3 Mass2Motifs and MS1 Peaks Statistics

On average, ~70% of fragmentation spectra can be explained by at least one structurally annotated Mass2Motifs (Table S-7).

| File     | Total MS1 peaks fragmented | MS1 peaks linked to at least one structurally annotated M2M | %         |
|----------|----------------------------|-------------------------------------------------------------|-----------|
| Beer1POS | 1282                       | 951                                                         | <b>74</b> |
| Beer2POS | 1567                       | 1160                                                        | <b>74</b> |
| Beer3POS | 1422                       | 1055                                                        | <b>74</b> |
| Beer4POS | 1363                       | 930                                                         | <b>68</b> |

Table S-7. Mass2Motif coverage of MS1 peaks by percentage of MS1 peaks that can be explained by at least one structurally annotated Mass2Motif for the files acquired in positive ionization mode.

## S2.4 Metabolite Annotations Using Mass2Motif Membership and Spectral Matching to the Nist\_msms and MassBank Databases

To assess how MS2LDA contributes to metabolite annotation, the MS1 peaks associated to the structurally characterized Mass2Motifs related to ferulic acid (M2M\_19), histidine (241), tyrosine (17) and tryptophan (202) in the Beer3 POS file were analysed in detail. Metabolite annotations were done using the structural information provided by MS2LDA. The resulting annotations can be found in Table S-8. Please note that most of those metabolites are no peptides thus representing small molecules differently from those encountered in proteomics/peptidomics and that out of the 51 associated MS1 peaks 9 were incorrectly associated to a

particular Mass2Motif by co-elution and co-fragmentation with an isobaric species that does genuinely contain the Mass2Motif substructure. To remove such incorrect associations, further improvements to obtain clear fragmentation spectra for each metabolite would be needed. Also, a fragment and an isotope were included in the associated MS1 peaks for histidine, leaving 39 metabolite features for further analysis.

Table S-8. Metabolite annotations based on Mass2Motif membership. \* indicates doubly charged species. The most likely annotation is presented based on Mass2Motif membership (classification) and the corresponding Metabolomics Standards Initiative Metabolite Identification level is indicated. The last column indicated whether or not the mass was annotated with a peptide.

| M2M | Mass [M+H] <sup>+</sup> | EF [M+H] <sup>+</sup> (most likely) | RT (s)   | Class        | Annotation                                        | MSI MI level | Peptide? |
|-----|-------------------------|-------------------------------------|----------|--------------|---------------------------------------------------|--------------|----------|
| 19  | 540.3306                | C30H44N4O5                          | 276      | -            | Co-elution and Co-fragmentation                   | 4            | -        |
| 19  | 307.1767                | C15H23N4O3                          | 547      | Ferulic acid | Feruloylagmatine                                  | 3            | No       |
| 19  | 540.2707                | C29H38N3O7                          | 263      | Ferulic acid | Diferuloyl-N1-acetylspermidine                    | 3            | No       |
| 19  | 498.2599                | C27H36N3O6                          | 616      | Ferulic acid | Diferuloyl-spermidine                             | 3            | No       |
| 19  | 307.0998                | C8H15N6O7                           | 613      | -            | Co-elution and Co-fragmentation                   | 4            | -        |
| 19  | 369.1182                | C17H21O9                            | 296      | Ferulic acid | Feruloylquinic acid                               | 3            | No       |
| 19  | 314.1386                | C18H20NO4                           | 270      | Ferulic acid | Feruloyltyramine                                  | 3            | No       |
| 19  | 265.1545                | C14H21N2O3                          | 1101     | Ferulic acid | Feruloylputrescine                                | 3            | No       |
| 19  | 194.0812                | C10H12NO3                           | 364, 378 | Ferulic acid | Feruloylamine                                     | 3            | No       |
| 19  | 195.1130                | C10H15N2O2                          | 379      | -            | Co-elution and Co-fragmentation                   | 4            | -        |
| 241 | 277.1582*               | C34H43N4OP                          | 305      | Histidine    | [Histidine-COOH] substructure present in molecule | 3            | No       |
| 241 | 318.1295                | C12H20N3O7                          | 569      | Histidine    | Histidine-hexoside                                | 3            | No       |
| 241 | 480.1822                | C18H30N3O12                         | 600      | Histidine    | Histidine-dihexoside                              | 3            | No       |
| 241 | 277.1585*               | C34H43N4OP                          | 427      | Histidine    | [Histidine-COOH] substructure present in molecule | 3            | No       |
| 241 | 310.2125                | C16H28N3O3                          | 240      | Histidine    | Histidine-decanoate conjugate                     | 3            | No       |
| 241 | 156.0768                | C6H10N3O2                           | 621      | Histidine    | Histidine                                         | 1            | No       |
| 241 | 198.0873                | C8H12N3O3                           | 481      | Histidine    | Acetyl-histidine                                  | 3            | No       |
| 241 | 364.1614                | C16H22N5O5                          | 466      | Histidine    | Histidine containing                              | 3            | Possibly |

|     |          |                |             |           |                                                                                               |   |     |
|-----|----------|----------------|-------------|-----------|-----------------------------------------------------------------------------------------------|---|-----|
|     |          |                |             |           | metabolite                                                                                    |   |     |
| 241 | 553.3097 | C34H43N4OP     | 305         | Histidine | [Histidine-COOH] substructure present in molecule – singly charged species of 277.1582 RT 305 | 3 | No  |
| 241 | 362.2166 | C15H30N4O6     | 503         | Histidine | Histidine-deoxy-trimethylamino-hexoside [conjugate of C9H22NO5-H2O]                           | 3 | No  |
| 241 | 110.0713 | C5H8N3         | 621         | Histidine | Histidine fragm.                                                                              | - | -   |
| 241 | 235.1077 | C12H15N2O3     | 409         | -         | Fragments of histidine motif co-fragmented by co-elution                                      | 4 | -   |
| 241 | 235.1187 | C11H15N4O2     | 414,<br>398 | Histidine | [Histidine-COOH] substructure present in molecule - Possibly Histidine-C5H5N conjugate        | 3 | No  |
| 241 | 157.0801 | C5[C13]H10N3O2 | 621         | Histidine | Histidine isotope                                                                             | - | -   |
| 241 | 277.1474 | ?              | 435         | Histidine | Fragments from motif in MS2 spectrum                                                          | 3 | -   |
| 241 | 251.1499 | C12H19N4O2     | 409         | Histidine | [Histidine-COOH] substructure present in molecule - Possibly Histidine-C6H9N conjugate        | 3 | No  |
| 241 | 195.0876 | C8H11N4O2      | 511         | Histidine | [Histidine-COOH] substructure present in molecule                                             | 3 | No  |
| 241 | 157.0738 | C7H11NO3       | 621         | -         | Fragments of histidine motif co-fragmented by co-elution                                      | 4 | -   |
| 241 | 272.0876 | C10H16N3O6     | 592         | Histidine | [Histidine-COOH] substructure present in molecule – Conjugated with [C5H8O7-H2O]              | 3 | No  |
| 241 | 363.1760 | ?              | 904         | -         | Only one fragment of Mass2Motif present in MS2 spectrum                                       | 4 | -   |
| 17  | 293.1131 | C14H17N2O5     | 431         | Tyrosine  | Pyroglutamyl-Tyrosine                                                                         | 3 | Yes |

|     |           |            |     |                     |                                                                                                    |   |     |
|-----|-----------|------------|-----|---------------------|----------------------------------------------------------------------------------------------------|---|-----|
| 17  | 182.0812  | C9H12NO3   | 585 | Tyrosine            | Tyrosine                                                                                           | 1 | No  |
| 17  | 280.1543  | C15H22NO4  | 255 | Tyrosine            | Tyrosine-hexanoate conjugate (or structural isomer of [C6H12O2-H2O])                               | 3 | No  |
| 17  | 308.1856  | C17H26NO4  | 234 | Tyrosine            | Tyrosine-octanoate conjugate (or structural isomer of [C8H16O2-H2O])                               | 3 | No  |
| 17  | 161.0921  | C6H13N2O3  | 385 | -                   | Not related to Tyrosine                                                                            | 4 | -   |
| 17  | 154.0974  | C8H12NO2   | 417 | -                   | Not related to Tyrosine – one abundant fragment in common                                          | 4 | -   |
| 202 | 205.0972  | C11H13N2O2 | 554 | Tryptophan (indole) | Tryptophan                                                                                         | 1 | No  |
| 202 | 206.0811  | C11H12NO3  | 414 | Tryptophan (indole) | 3-Indolelactate (analogue of Tryptophan with NH2 replaced by OH; sharing the same indole backbone) | 3 | No  |
| 202 | 367.1500  | C17H23N2O7 | 504 | Tryptophan (indole) | Tryptophan-hexoside                                                                                | 3 | No  |
| 202 | 218.0811  | C12H12NO3  | 279 | Tryptophan (indole) | 3-Indoleoxobutyrate                                                                                | 3 | No  |
| 202 | 334.1398  | C16H20N3O5 | 541 | Tryptophan (indole) | Glutamyl-Tryptophan                                                                                | 3 | Yes |
| 202 | 188.0706  | C11H10NO2  | 553 | Tryptophan (indole) | Fragment of Tryptophan                                                                             | - | -   |
| 202 | 291.0973  | C14H15N2O5 | 561 | Tryptophan (indole) | Indole containing molecule - cofragmentation                                                       | 3 | No  |
| 202 | 222.1124  | C12H16NO3  | 288 | Tryptophan (indole) | Indole containing molecule                                                                         | 3 | No  |
| 202 | 277.1585* | C34H43N4OP | 427 | Tryptophan (indole) | Indole containing molecule                                                                         | 3 | No  |
| 202 | 277.1474  | ?          | 436 | -                   | Cofragmentation                                                                                    | 4 | -   |
| 202 | 237.0869  | C11H13N2O4 | 470 | Tryptophan          | Indole containing                                                                                  | 3 | No  |

|     |                        |                         |     |                        |                                              |   |    |
|-----|------------------------|-------------------------|-----|------------------------|----------------------------------------------|---|----|
|     |                        |                         |     | (indole)               | molecule                                     |   |    |
| 202 | 208.0597               | C10H12NO4               | 445 | Tryptophan<br>(indole) | Indole containing molecule                   | 3 | No |
| 202 | 261.0934               | ?                       | 508 | -                      | Few low abundant fragments related to indole | 4 | -  |
| 202 | 190.1437<br>(190.0861) | C9H20NO3<br>(C11H12NO2) | 435 | Tryptophan<br>(indole) | Co-elution with:<br>3-Indolepropionic acid   | 3 | No |
| 202 | 146.0599               | C9H8NO                  | 410 | -                      | Fragment of 3-Indolepropionic acid           | - | -  |

In order to assess how well spectral matching would perform on the same set of metabolites annotated based on their Mass2Motif (see Table S-8). Spectral matching was performed using the mspepsearch program (<http://chemdata.nist.gov/dokuwiki/doku.php?id=peptidew:mspepsearch>) against a local instance of the Nist\_msms and the MassBank databases. For every fragmentation spectra in all the Beer datasets, an .MSP file was generated. This file was used as input for spectral matching using mspepsearch against the two spectral databases. The results from spectral matching were stored and used to obtain the matches for the metabolites from Table S-8 by specifying m/z and RT tolerances for the parent (MS1) peaks to search for, or by specifying a Mass2Motif ID (number). In the latter case, spectral annotations of all fragmentation spectra that can be explained by that Mass2Motif (at above the threshold on the Mass2Motif-to-spectra distributions) can be retrieved. Table S-9 presents the results of the spectral matching of ferulic acid, histidine, tyrosine, and tryptophan related metabolites, showing that out of the 39 with MS2LDA annotated metabolites, 7 resulted in correct hits with another 8 producing structurally related hits. These results clearly demonstrate the annotative power of MS2LDA, through which annotations can be made by matching only small portions of the spectra and therefore allowing annotation (classification) of molecules not present in database.

Table S-9. Results of spectral matching of MS1-MS2 pairs explained by four Mass2Motifs. Masses for which a correct match was found in any of the three databases (Nist\_msms, Nist\_msms2, and MassBank) are indicated in bold and \* indicates doubly charged species. Mass2Motif numbers correspond to the beer3 positive ionization data set.

| M2M | Mass [M+H] <sup>+</sup> | EF [M+H] <sup>+</sup> (most likely) | RT (s) | Database Annotations                         | EFs top hits of each database | Database                | Normalized Score |
|-----|-------------------------|-------------------------------------|--------|----------------------------------------------|-------------------------------|-------------------------|------------------|
| 19  | 540.3306                | C30H44N4O5                          | 276    | Co-elution and Co-fragmentation              | -                             | -                       | -                |
| 19  | 307.1767                | C15H23N4O3                          | 547    | Pinolenic acid ethyl ester                   | C20H34O2                      | Nist_msms               | 6.79             |
| 19  | 540.2707                | C29H38N3O7                          | 263    | Leptomycin B<br>Anti-Inflammatory Peptide 1  | C33H48O6<br>C45H82N12O14S2    | Nist_msms<br>Nist_msms2 | 32.3<br>20.29    |
| 19  | 498.2599                | C27H36N3O6                          | 616    | Chicoric acid<br>(2R,3R-O-dicaffeoyltartaric | C22H18O12                     | Nist_msms               | 79.24            |



|     |           |             |             |                                                                                         |                                                |                                                     |                              |
|-----|-----------|-------------|-------------|-----------------------------------------------------------------------------------------|------------------------------------------------|-----------------------------------------------------|------------------------------|
|     |           |             |             | acid)                                                                                   |                                                |                                                     |                              |
| 19  | 307.0998  | C8H15N6O7   | 613         | Co-elution and<br>Co-fragmentation                                                      | -                                              | -                                                   | -                            |
| 19  | 369.1182  | C17H21O9    | 296         | Curcumin                                                                                | C21H20O6                                       | Nist_msm<br>s                                       | 67.72                        |
| 19  | 314.1386  | C18H20NO4   | 270         | Stearic acid ethyl<br>ester                                                             | C20H40O2                                       | Nist_msm<br>s                                       | 19.87                        |
| 19  | 265.1545  | C14H21N2O3  | 1101        | 3,4-<br>Dihydroxycinnamic<br>acid (L-alanine<br>methyl ester) amide                     | C13H15NO5                                      | Nist_msm<br>s                                       | 86.02                        |
| 19  | 194.0812  | C10H12NO3   | 364,<br>378 | 3-Hydroxy-4-<br>methoxycinnamic<br>acid<br>(=ferulic acid)<br>Prowl(TM)                 | C10H10O4<br><br>C13H19N3O4                     | Nist_msm<br>s<br><br>MassBank                       | 87.71<br><br>3.75            |
| 19  | 195.1130  | C10H15N2O2  | 379         | Co-elution and<br>Co-fragmentation                                                      | -                                              | -                                                   | -                            |
| 241 | 277.1582* | C34H43N4OP  | 305         | Leu-Enkephalin,<br>amide 1/4,L,Amidat<br>ed<br><br>PyroGlu-Phe                          | C28H38N6O6<br><br>C14H16N2O7                   | Nist_msm<br>s2<br><br>Nist_msm<br>s                 | 13.21<br><br>9.33            |
| 241 | 318.1295  | C12H20N3O7  | 569         | 5(S),6(R)-11-trans<br>DiHETE<br><br>Tyr-His                                             | C20H32O4<br><br>C15H10N4O4                     | Nist_msm<br>s<br><br>Nist_msm<br>s                  | 93.28<br><br>0.71            |
| 241 | 480.1822  | C18H30N3O12 | 600         | 1-(9Z-<br>Octadecenoyl)-sn-<br>glycero-3-<br>phosphoethanolamin<br>e                    | C23H46NO7P                                     | Nist_msm<br>s                                       | 48.9                         |
| 241 | 277.1585* | C34H43N4OP  | 427         | L-Saccharopine<br><br>Leu-Enkephalin,<br>amide 1/4,L,Amidat<br>ed<br><br>L-Saccharopine | C11H20N2O6<br><br>C28H38N6O6<br><br>C11H20N2O6 | MassBank<br><br>Nist_msm<br>s2<br><br>Nist_msm<br>s | 7.79<br><br>6.28<br><br>5.79 |
| 241 | 310.2125  | C16H28N3O3  | 240         | Sar1,Ala8]<br>Angiotensin<br>II 1/0,G,N-                                                | C43H67N13O1<br>0                               | Nist_msm<br>s2                                      | 81.08                        |

|     |                 |                |             |                                                                          |                                        |                                     |                      |
|-----|-----------------|----------------|-------------|--------------------------------------------------------------------------|----------------------------------------|-------------------------------------|----------------------|
|     |                 |                |             | Methyl 76/76<br>D-erythro-Sphingosine C-20                               | C20H41NO2                              | Nist_msms                           | 17.27                |
| 241 | <b>156.0768</b> | C6H10N3O2      | 621         | His<br>L-Histidine                                                       | C6H9N3O2<br>C6H9N3O2                   | MassBank<br>Nist_msms               | 98.35<br>98.35       |
| 241 | <b>198.0873</b> | C8H12N3O3      | 481         | N-Acetylhistidine<br>His-Leu-Lys                                         | C8H11N3O3<br>C18h32N6O4                | MassBank<br>Nist_msms               | 98.94<br>0.98        |
| 241 | 364.1614        | C16H22N5O5     | 466         | pyro-Glu-His-Pro-NH2<br>TRH (Protirelin)                                 | C16H22N6O4<br>C16H22N6O4               | Nist_msms<br>MassBank               | 89.01<br>89.01       |
| 241 | 553.3097        | C34H43N4OP     | 305         | Inosine 5'-triphosphate<br>R15K, HIV-1 Inhibitory Peptide 26/26          | C10H15N4O14P3<br>C73H126N26O18         | Nist_msms<br>Nist_msms2             | 21.35<br>17.2        |
| 241 | 362.2166        | C15H30N4O6     | 503         | pyro-Glu-His-Pro-NH2<br>TRH (Protirelin)                                 | C16H22N6O4<br>C16H22N6O4               | Nist_msms<br>MassBank               | 89.14<br>89.14       |
| 241 | 110.0713        | C5H8N3         | 621         | - (fragment)                                                             | -                                      | -                                   | -                    |
| 241 | 235.1077        | C12H15N2O3     | 409         | His-Pro                                                                  | C11H16N4O3                             | Nist_msms                           | 98.98                |
| 241 | 235.1187        | C11H15N4O2     | 414,<br>398 | His-Pro<br>His-Pro                                                       | C11H16N4O3<br>C11H16N4O3               | Nist_msms<br>Nist_msms              | 98.98<br>98.98       |
| 241 | 157.0801        | C5[C13]H10N3O2 | 621         | - (isotope)                                                              | -                                      | -                                   | -                    |
| 241 | 277.1474        | ?              | 435         | L-Saccharopine<br>Leu-Enkephalin, amide 1/4,L,Amidated<br>L-Saccharopine | C11H20N2O6<br>C28H38N6O6<br>C11H20N2O6 | MassBank<br>Nist_msms2<br>Nist_msms | 7.79<br>6.28<br>7.79 |
| 241 | 251.1499        | C12H19N4O2     | 409         | Trp-His-Arg                                                              | C23H31N9O4                             | Nist_msms                           | 44.16                |
| 241 | 195.0876        | C8H11N4O2      | 511         | Cys-His-Lys                                                              | C15H26N6O4S                            | Nist_msms                           | 22.64                |

|     |                 |            |     |                                                                    |                                |                                 |                |
|-----|-----------------|------------|-----|--------------------------------------------------------------------|--------------------------------|---------------------------------|----------------|
|     |                 |            |     | 1,3-Dimethylurate                                                  | C7H8N4O3                       | s<br>MassBank                   | 7.68           |
| 241 | 157.0738        | C7H11NO3   | 621 | Co-elution and<br>Co-fragmentation                                 | -                              | -                               | -              |
| 241 | 272.0876        | C10H16N3O6 | 592 | 5-Androsten-<br>3.beta.,17.beta.-diol<br>Androsterone              | C19H30O2<br>C19H30O2           | Nist_msm<br>s<br>MassBank       | 18.48<br>6.06  |
| 241 | 363.1760        | ?          | 904 | -                                                                  | -                              | -                               | -              |
| 17  | <b>293.1131</b> | C14H17N2O5 | 431 | PyroGlu-Tyr<br>Insulin-Like Growth<br>[Tyr0] Factor II (33-<br>40) | C14H16N2O5<br>C47H83N21O1<br>4 | Nist_msm<br>s<br>Nist_msm<br>s2 | 97.81<br>0.12  |
| 17  | <b>182.0812</b> | C9H12NO3   | 585 | Etilefrine<br>L-Tyrosine                                           | C10H15NO2<br>C9H11NO3          | Nist_msm<br>s<br>MassBank       | 76.41<br>6.67  |
| 17  | 280.1543        | C15H22NO4  | 255 | Tyr-Val                                                            | C14H20N2O4                     | Nist_msm<br>s                   | 65.96          |
| 17  | 308.1856        | C17H26NO4  | 234 | DL-Octopamine<br>Tyr-Met-Arg-Phe-<br>NH2 1/3,F,Amidate<br>d 38/38  | C8H11NO2<br>C29H42N8O5S        | Nist_msm<br>s<br>Nist_msm<br>s2 | 95.56<br>2.42  |
| 17  | 161.0921        | C6H13N2O3  | 385 | Bethanechol cation<br>L-2-Aminoadipic<br>acid                      | C7H17N2O2<br>C6H11NO4          | Nist_msm<br>s<br>MassBank       | 62.46<br>15.44 |
| 17  | 154.0974        | C8H12NO2   | 417 | 5-Aminosalicylic<br>acid<br>3-Sulfinio-L-alanine                   | C7H7NO3<br>C3H7NO4S            | Nist_msm<br>s<br>MassBank       | 62.64<br>3.14  |
| 202 | <b>205.0972</b> | C11H13N2O2 | 554 | L-Tryptophan<br>Trp                                                | C11H12N2O2<br>C11H12N2O2       | Nist_msm<br>s<br>MassBank       | 98.99<br>98.99 |
| 202 | <b>206.0811</b> | C11H12NO3  | 414 | DL-Indole-3-lactic<br>acid                                         | C11H11NO3                      | Nist_msm<br>s                   | 98.23          |
| 202 | 367.1500        | C17H23N2O7 | 504 | Trp(Dioxidation)-<br>Glu                                           | C16H19N3O7                     | Nist_msm<br>s                   | 61.69          |
| 202 | 218.0811        | C12H12NO3  | 279 | N-Acetyl-5-<br>hydroxytryptamine                                   | C12H14N2O2                     | Nist_msm<br>s                   | 64.65          |
| 202 | 334.1398        | C16H20N3O5 | 541 | Trp-Lys<br>Trp-Glu                                                 | C17H24N4O3<br>C16H19N3O5       | Nist_msm<br>s<br>Nist_msm       | 97.37<br>0.31  |

|     |                                    |                         |     |                                                    |            |               |       |
|-----|------------------------------------|-------------------------|-----|----------------------------------------------------|------------|---------------|-------|
|     |                                    |                         |     |                                                    |            | s             |       |
| 202 | 188.0706                           | C11H10NO2               | 553 | - (fragment)                                       | -          | -             | -     |
| 202 | 291.0973                           | C14H15N2O5              | 561 | (+)-Catechin                                       | C15H14O6   | Nist_msm<br>s | 93.7  |
| 202 | 222.1124                           | C12H16NO3               | 288 | 2,6-Di-tert-butylbenzoquinone                      | C14H20O2   | Nist_msm<br>s | 71.83 |
| 202 | 277.1585*                          | C34H43N4OP              | 427 | L-Saccharopine                                     | C11H20N2O6 | MassBank      | 7.79  |
|     |                                    |                         |     | L-Saccharopine                                     | C11H20N2O6 | Nist_msm<br>s | 7.79  |
| 202 | 277.1474                           | ?                       | 436 | Co-elution and<br>Co-fragmentation                 | -          | -             | -     |
| 202 | 237.0869                           | C11H13N2O4              | 470 | Carbetamide                                        | C12H16N2O3 | Nist_msm<br>s | 73.34 |
| 202 | 208.0597                           | C10H12NO4               | 445 | L-Kynurenine                                       | C10H12N2O3 | Nist_msm<br>s | 32.88 |
|     |                                    |                         |     | Kynurenine                                         | C10H12N2O3 | MassBank      | 2.87  |
| 202 | 261.0934                           | ?                       | 508 | Few low abundant<br>fragments related to<br>indole | -          | -             | -     |
| 202 | 190.1437<br>( <b>190.0861</b><br>) | C9H20NO3<br>(C11H12NO2) | 435 | 1H-Indole-2-<br>carboxylic acid,<br>ethyl ester    | C11H11NO2  | Nist_msm<br>s | 68.25 |
| 202 | 146.0599                           | C9H8NO                  | 410 | Fragment of 3-<br>Indolepropionic acid             | -          | -             | -     |

## S2.5 Co-occurrences of Fragments and Losses in Matched Mass2Motifs from Different Samples

The correspondence of different Mass2Motifs, discovered through running MS2LDA independently on each beer sample, can be established through matching of the fragment or loss features that comprise the Mass2Motifs. Figure S-10 shows the same histidine-related Mass2Motifs discovered through explorations of the Beer1 and Beer3 results via MS2LDAVis. The ‘Mass2Motif Feature Frequencies’ histograms (Figure S-6A, S-6C) display how often particular fragments or losses appear in spectra including this Mass2Motif, indicating their consistency. For example, from Figure S-9A and S-9C we can see that the fragments 110.0718 ( $[C_5H_8N_3]^+$ ) and 93.0450 ( $[C_5H_5N_2]^+$ ) m/z are most consistently present in the histidine Mass2Motifs for Beer 1 and Beer 3. The ‘Mass2Motif Global Frequencies’ histograms (Figure S-9B, S-9D) show how specific these fragments and losses are to this Mass2Motif. The blue bars show the total abundance of each fragment (or loss) in the entire dataset whilst the red bars show the abundance that can be attributed to this Mass2Motif. We see from Figures S-6B and S-6D that globally, most of the observed fragments with m/z 110.0718 ( $[C_5H_8N_3]^+$ ) are explained by these histidine-related Mass2Motifs, and whereas the fragment at m/z 95.0608 is consistently present in these Mass2Motifs, it is also abundantly present elsewhere.

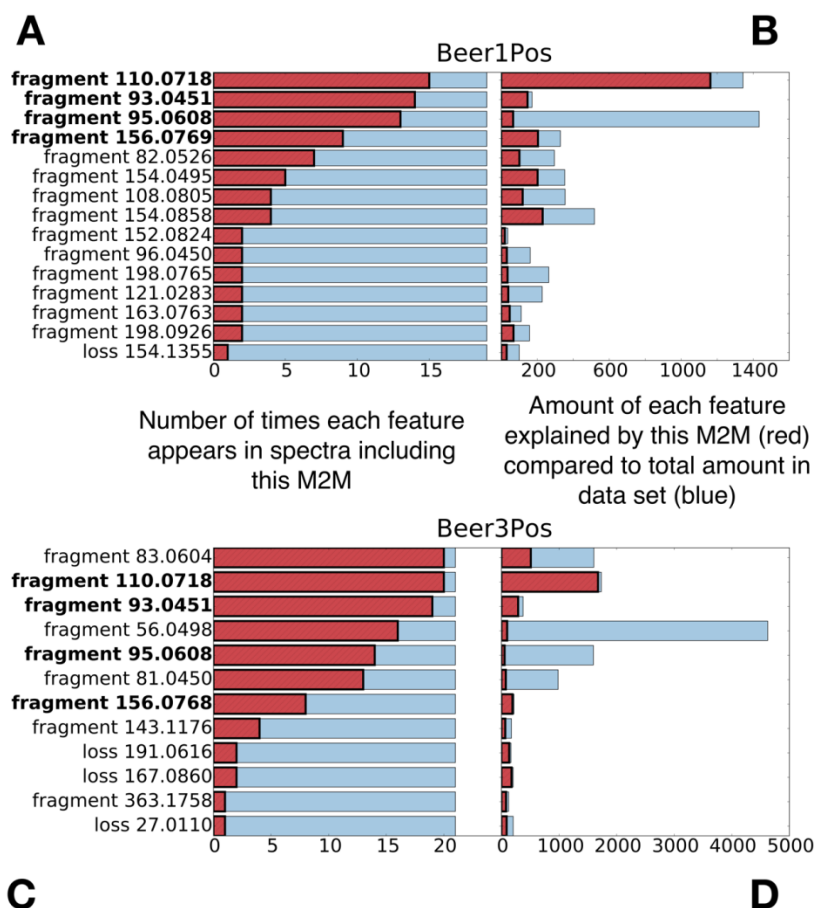

Figure S-10. Similar sets of fragment and loss features can be seen in the MS2LDAVis Feature Frequency histograms for the histidine-related Mass2Motifs in positive mode of Beer1 (top) and Beer3 (bottom). The left-hand panels of **A**) and **C**) show the number of times each feature appears in spectra associated with this Mass2Motif while the right-hand panels of **B**) and **D**) show the proportion (red) of the total abundance (blue) of this feature within the dataset explained by this Mass2Motif. Using **B**) as an example, we see that this Mass2Motif accounts for the vast majority of the total abundance observed for the fragment with mass 110.0718 in Beer1. Conversely, we also see in **B**) that although the fragment with mass 95.0608 appears often in the spectra associated with this Mass2Motif, it appears widely elsewhere too. Because the analyses of the four beers were done separately, fragment masses do not exactly match across samples.

## S2.6 Similar yet Different Aromatic Substructures of Phenylethene, Ethylphenol, and Phenylethyleneamine

The following three aromatic substructures (illustrated in Figure S-11) were present and could be annotated to Mass2Motifs found in all positive ionization mode Beer files:

- Phenylethene
- Proposed aromatic substructure derived from cinnamic acid (cinnamate)
- [phenylalanine-CHOOH] or 1-(phenylethene)-amine.

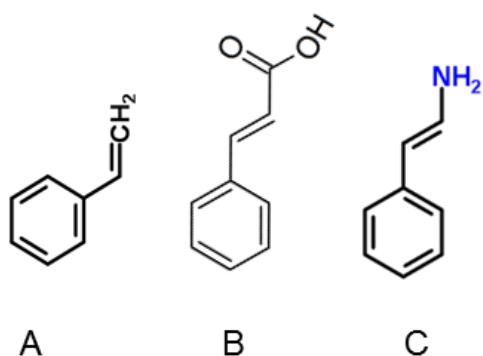

Figure S-11. Three aromatic substructures annotated to Mass2Motifs found in all four Beer fragmentation files, with **A**) phenylethene, **B**) proposed aromatic substructure derived from cinnamic acid (cinnamate), and **C**) [phenylalanine-CHOOH] or 1-(phenylethene)-amine.

Using the Beer2 positive ionization mode data as an example, the following list of Mass2Motifs is observed:

- **Mass2Motif 72** is a Phenylethene substructure motif. It has a degree of 38 and is characterized by the following fragment/loss features: fragment\_105.0702 (C8H9), fragment\_79.0541 (C6H7), **fragment\_91.0541 (C7H7)**, fragment\_53.0388, C8H9 (C4H5).
- **Mass2Motif 202** is a Cinnamic acid (cinnamate)-based substructure motif. It has a degree of 22 and is characterized by the following fragment/loss features: **fragment\_91.0541 (C7H7)**, fragment\_119.0488 (C8H7O), fragment\_147.0437 (C9H7O2), fragment\_65.0388 (C5H5).
- **Mass2Motif 117** is a [phenylalanine-CHOOH]-based substructure motif. It has a degree of 50 and is characterized by the following fragment/loss features: fragment\_118.0654 (C8H8N), fragment\_117.0571 (C8H7N), **fragment\_91.0541 (C7H7)**, fragment\_130.0645 (C9H8N), fragment\_188.0706 (C11H10NO2).

In the above list, all Mass2Motifs share one fragment, highlighted in red, which is related to the aromatic core (mono-substituted benzene ring), i.e., fragment C<sub>7</sub>H<sub>7</sub> [M+H]<sup>+</sup> (91.0541 m/z); however, in combination with other mass fragments, these three aromatic substructures are distinguishable by MS2LDA.

## S2.7 Structurally Annotated Mass2Motifs Can Explain Matched Standards

The following list describes the Mass2Motifs, alongside their annotations, which can be associated to the fragmentation spectra of the Standard peaks shown in Figure 3 of the paper. The degree of a Mass2Motif indicates the number of MS2 fragmentation spectra in the beer3 positive ionization mode data having fragment or loss features that can be explained by the Mass2Motif (at the specified thresholding level).

- **Mass2Motif 115** is a [phenylalanine-CHOOH]-based substructure motif. It has a degree of 28 and is characterized by the following fragment/loss features: fragment\_120.0808 (C8H10N), fragment\_103.0546 (C8H7), fragment\_91.0541 (C7H7).
- **Mass2Motif 156** is a [ribose (pentose, C5-sugar)-H2O]-related loss motif. It has a degree of 22 and is characterized by the following fragment/loss features: loss\_132.0421 (C5H8O4).
- **Mass2Motif 202** is a [tryptophan-NH3]-related substructure. It has a degree of 15 and is characterized by the following fragment/loss features: fragment\_118.0654 (C8H7N), fragment\_117.0571 (C7H7), fragment\_91.0541 (C9H8N), fragment\_130.0645 (C9H8N), fragment\_188.0706 (C11H10NO2)
- **Mass2Motif 211** is an N-acetylputrescine substructure motif. It has a degree of 24 and is characterized by the following fragment/loss features: loss\_59.0370 (C2H5NO), fragment\_114.0912 (C6H12NO), fragment\_72.0447 (C3H6NO), fragment\_60.0448 (C2H6NO).
- **Mass2Motif 214** is an amine loss motif. It has a degree of 57 and is characterized by the following fragment/loss features: loss\_17.0247 (NH3).
- **Mass2Motif 220** is an adenine substructure motif. It has a degree of 32 and is characterized by the following fragment/loss features: fragment\_136.0629 (C5H6N5), fragment\_119.0351 (C5H3N4)
- **Mass2Motif 241** is a histidine substructure motif. It has a degree of 21 and is characterized by the following fragment/loss features: fragment\_110.0718 (C5H8N3), fragment\_156.0769 (C6H10N3O2), fragment\_93.0450 (C5H5N2), fragment\_95.0608 (C5H7N2).
- **Mass2Motif 262** is a combined loss of H2O and CO motif, indicative for free carboxylic acid group (COOH). It has a degree of 90 and is characterized by the following fragment/loss features: loss\_46.0053 (CH2O2).

## S2.8 GNPS and Massbank Results

To evaluate and validate the discovered Mass2Motifs using Beer fragmentation files, we performed MS2LDA analyses of the MassBank (10) and the Global Natural Products service (GNPS) (11) data sets as used by Dührkop et al. to train and test their CSI:FingerID tool (12). These datasets contain fragmentation spectra of thousands of reference compounds from different sources as chemical standards or isolated natural products. The fragmentation spectra were all acquired in positive ionization mode and generated at different instruments across the world. In (12), spectra from Orbitrap instruments were omitted (which allowed us to also test the extent to which Mass2Motifs are transferable across measurement platforms). A special feature extraction pipeline was developed to successfully bin mass fragments and losses from the diverse set of fragmentation spectra (see Section S1.1 for details). For LDA inference, Variational Bayes inference was applied to both data sets (see Section S1.2 for details). The resulting 1953 and 5670 spectra from MassBank and GNPS, respectively, were decomposed into 500 Mass2Motifs each.

### Validation of beer-characterized Mass2Motifs in MassBank and GNPS data sets

To assess how well Mass2Motifs characterized in another dataset can be used for metabolite annotation in another dataset, the ~30 Mass2Motifs structurally characterized in beer were incorporated into the model (see Section S1.2), whilst the remaining Mass2Motifs were inferred by MS2LDA. To match the beer Mass2Motifs, we searched for the chemical formulas of the relevant fragments and neutral losses in the GNPS and Massbank features. A Mass2Motif was incorporated into the analysis if features corresponding to at least 50% of the Mass2Motifs probability could be found in GNPS or Massbank. This resulted in slightly different Mass2Motifs being matched in the two datasets (some beer features did not exist in the GNPS and Massbank data set) but a set of 22 Mass2Motifs were found in both. This demonstrates that the patterns of fragment and loss features that comprise Mass2Motifs can be transferred across spectra from different instruments.

As all the fragmented metabolite structures from the MassBank and GNPS datasets are known, we could validate the presence of beer-characterized Mass2Motif chemical substructures or chemical features in the molecular structures of spectra associations to these beer-characterized Mass2Motifs. Using 2D chemical structure images from ChemSpider (extracted via a search on InChIKey using ChemSpiPy <http://chemspipy.readthedocs.io/en/latest/>) JvdH manually validated annotations on all molecules that included one or more of the beer Mass2Motifs by checking if the characterized substructure or structural feature were present in the molecular structures. In some cases, closely related substructures (not discriminable by mass spectrometry) were also considered as true, for example in case of isomeric substructures. In samples from one biological origin, substructures often relate to one isomer; however, in a set of thousands of standards, there is often more diversity. The resulting Tables for these analysis (GNPS\_Mass2Motif\_validations.csv and MassBank\_Mass2Motif\_validations.csv) can be found here: <http://dx.doi.org/10.5525/gla.researchdata.313> .

From this manual validation, we computed two performance measures, the proportion of correct annotations at a probability threshold of 0.1 (i.e. if the spectra to Mass2Motif probability was  $\geq 0.1$ ) with the results that 81.5% of annotations were correct in MassBank and 63.3% in GNPS. This shows the application of MS2LDA on different type of fragmentation spectra (other instruments), and the set of standards from MassBank and GNPS allowed us to determine false positive rates for the discovery of common substructures/structural features by MS2LDA. To investigate the performance across the different Mass2Motifs, we computed the Area Under the ROC curve for molecules connected to each Mass2Motif. The results are shown in Figure S-12. In a small number of Mass2Motifs, either all of the annotated molecules were correct, or all were incorrect making it impossible to define an AUC value. In these cases, we have instead plotted the accuracy at a threshold of 0.1. These cases are: Massbank: Mass2Motif 19, all incorrect but with probabilities below 0.1, Mass2Motif 20, all incorrect but all below 0.1 and GNPS: Mass2Motif 21, all incorrect but all with probabilities below 0.1.



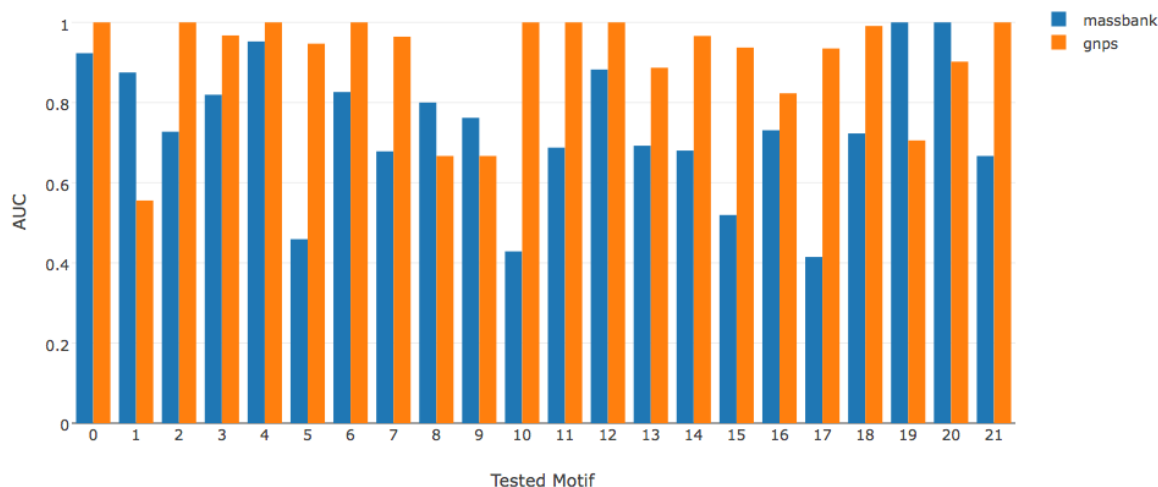

Figure S-12: GNPS and Massbank performance for the tested motifs. Motif numbers correspond to those in Table S-13. Motif names are shown in the table below.

| Verified Mass2Motif | Description                                                                                                                                                                              |
|---------------------|------------------------------------------------------------------------------------------------------------------------------------------------------------------------------------------|
| 0                   | Small nitrogen containing fragment ion (often proline or ornithine derived) most abundant fragment in beer data.                                                                         |
| 1                   | Fragments indicative for asparagine substructure (MzCloud), prevalent in Beer 3.                                                                                                         |
| 2                   | Oxygen-rich losses and fragments also occurring in hexose spectra - related to M2M 211 (hexose [glucose] conjugation) - possibly hydrated-hexose loss?                                   |
| 3                   | Combined loss of H <sub>2</sub> O and CO, indicative for free carboxylic acid group (COOH) , a generic substructure in amino acids and organic acids.                                    |
| 4                   | Nitrogen containing substructure [C <sub>5</sub> H <sub>12</sub> N] (in beer related to Leucine).                                                                                        |
| 5                   | Alkyl aromatic substructure - indicative for aromatic ring with 2-carbon alkyl chain attached i.e. phenylethene fragment from ethylbenzene as a result of the fragmentation process.     |
| 6                   | Fragment indicative for aromatic compounds related to methylbenzene substructure (C <sub>7</sub> H <sub>7</sub> fragment).                                                               |
| 7                   | [Pentose (C <sub>5</sub> -sugar)-H <sub>2</sub> O] related loss , indicative for conjugated pentose sugar - EF fits.                                                                     |
| 8                   | Fragment ions indicative for pyroglutamic acid (pyroglutamate) or glutamine (both in MzCloud) - structure can be formed from glutamic acid (glutamate) in the mass spectrometer as well. |
| 9                   | Fragments indicative of a glycosylation , .e., indicative for a sugar conjugation (in beer often related to glucose).                                                                    |
| 10                  | Fragments indicative for histidine (C <sub>6</sub> H <sub>10</sub> N <sub>3</sub> O <sub>2</sub> ) substructure (MzCloud)                                                                |
| 11                  | Imidazole group linked to a carboxylgroup through one CH <sub>2</sub> group i.e. like in imidazole acetic acid.                                                                          |

|    |                                                                                                                                                                                                          |
|----|----------------------------------------------------------------------------------------------------------------------------------------------------------------------------------------------------------|
| 12 | Fragment ions indicative for alkylamine substructure C <sub>5</sub> H <sub>10</sub> N (in beer often pipecolic acid [pipecolate]).                                                                       |
| 13 | Fragments indicative for cinnamic/hydroxycinnamic acid substructure                                                                                                                                      |
| 14 | Double water loss i.e. 2*H <sub>2</sub> O - Generic feature for metabolites containing several free OH groups attached to a aliphatic chain like sugars.                                                 |
| 15 | Water loss - indicative of a free hydroxyl group (in beer often seen in sugary structures).                                                                                                              |
| 16 | Fragments indicative for [phenylalanine-CHOOH] based substructure.                                                                                                                                       |
| 17 | CO loss - indicative for presence of ketone/aldehyde/lactone group (C=O).                                                                                                                                |
| 18 | Amine loss - Indicative for free NH <sub>2</sub> group in fragmented molecule.                                                                                                                           |
| 19 | Fragment ions indicative for C <sub>6</sub> H <sub>12</sub> NO substructure (in beer related to N-acetylputrescine - MzCloud).                                                                           |
| 20 | Fragments indicative for ferulic acid based substructure (MzCloud).                                                                                                                                      |
| 21 | Fragments indicative for dihydroxylated benzene ring substructure (MzCloud) - C <sub>6</sub> H <sub>5</sub> O <sub>2</sub> fragment corresponds to positively charged fragment with two hydroxyl groups. |

Table S-13: Characterisation of populated Mass2Motifs in GNPS and Massbank.

Assessment of number of validated Mass2Motifs per MassBank and GNPS fragmentation spectrum

MS2LDA can provide multiple annotations per molecule as multiple Mass2Motifs can be used to decompose an individual spectrum. Figure 4 in the manuscript demonstrates this for a single example. Here we investigate the extent to which the GNPS and Massbank molecules contain multiple validated beer Mass2Motif annotations. I.e., for each of the spectra with validated annotations, we count the number that have 1, 2, 3 or 4 validated annotations (i.e. to have 2 validated annotations, the molecule must include 2 of the Mass2Motifs structurally characterized in beer, both of which have been manually validated to be correct). The results can be seen in Figure S-14. In summary, of the 694 Massbank spectra that had one or more validated annotations, 173 had two, 36 3 and 3 4. For GNPS, of the 613 spectra with one or more, 34 had 2 and 4 had 3. In both cases, this demonstrates the large number of molecules for which MS2LDA can provide multiple annotations, thereby aiding in structural characterization. It is particularly noteworthy that all of this is from just the small number (~30) Mass2Motifs that we characterized from our beer analysis not including any MassBank or GNPS discovered Mass2Motifs.

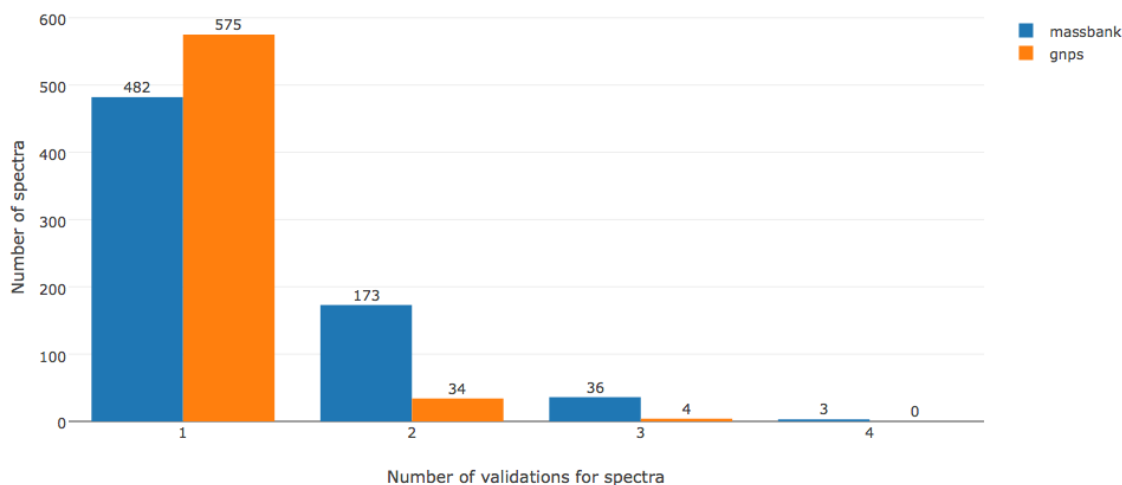

Figure S-14: the number of validations per spectra in the Massbank (blue) and GNPS (orange) data sets.

### MS2LDA finds not previously characterized Mass2Motifs in MassBank and GNPS data sets

To assess whether MS2LDA could also discover new Mass2Motifs within the MassBank and GNPS data sets that were not previously characterized in beer, we checked the resulting MS2LDA networks for non-beer-characterized mass2motifs, and we were able to structurally characterize 6 for each of the data sets to demonstrate the versatility of MS2LDA:

#### MassBank:

- motif\_377: kaempferol/glycosylated kaempferol substructure (flavonoid – plant metabolite)
- motif\_439: quercetin/glycosylated quercetin substructure (flavonoid – plant metabolite)
- motif\_472: atenolol related (antihypertensive drug)
- motif\_273: loss of [deoxyhexose-H<sub>2</sub>O]
- motif\_377: loss of methyl group – indicative for presence of a methoxy [O-CH<sub>3</sub>] group
- motif\_191: loss of C<sub>3</sub>H<sub>6</sub> - indicative for the presence of an isopropyl group

#### GNPS:

- motif\_214: benzene sulfonamide
- motif\_176: 2-oxochromen-7-yl (mainly dimethylated)
- motif\_436: 2-oxochromen-7-yl (mainly trimethylated)
- motif\_121: sterone related
- motif\_72: benzene chloride
- motif\_287: C<sub>4</sub>H<sub>8</sub> loss indicative for saturated C<sub>4</sub>-alkyl substructure (mainly tert-butylgroup and loss from 8,8-Trimethyl-2-oxo-9,10-dihydro-2H,8H-pyrano[2,3-f]chromen-5-yl substructure)

This indicates that MS2LDA can find a wide range of structurally diverse mass2motifs not related to the beer motifs, which are in fact complementary to those found in the beer data.

### MS2LDA applied to urine data

MS2LDA was applied to fragmentation data from a human urine sample, representing a complex sample matrix (13). As with the GNPS and Massbank analyses, the structurally characterized Mass2Motifs from the beer analysis were incorporated through matching the relevant features. To validate the annotations provided by

these structurally characterized Mass2Motifs we detected the same 45 standard molecules that we were able to detect in the beer analysis via mass and RT matching (the urine sample was run in the same batch as the beer samples ensuring that only minimal RT drift had occurred). As the structural identify of these 45 molecules is known we manually validated the resulting annotations and found that at a threshold of 0.1, 74.3% of the annotations were validated. We also investigated the extent to which the same Mass2Motifs could be found in an analysis without them being fixed in the analysis a-priori. By matching features after processing and considering two Mass2Motif to match if shared features account for at least 0.5 of the probability in the Mass2Motif in both beer and urine, we found matches for 21 out of the 38 motifs structurally characterized in beer 3. These two analyses demonstrate the robustness of Mass2Motifs discovered through MS2LDA.

## S2.9 Molecular Networking of Beer Fragmentation Files

To compare Molecular Networking with MS2LDA, the generated .mzXML files of the Beer fragmentation .RAW files were uploaded into the Global Natural Products Social Molecular Networking (GNPS) environment (<http://gnps.ucsd.edu>, a free account is required to log in) using FTP to transfer all the files and a text file containing information on the files as there are more than 6 different samples (files) that should be compared. Parameter optimization for molecular network generation for the high-resolution mass spectrometry data sets resulted in the following settings. The data was clustered with MS-Cluster with a precursor mass tolerance of 0.25 Da and a MS/MS fragment ion tolerance of 0.005 Da to create consensus spectra. Then, consensus spectra that contained less than 2 spectra were discarded. A network was created where edges were filtered to have a cosine score above 0.55 and 2 or more matched peaks. Further edges between two nodes were kept in the network if and only if each of the nodes appeared in each other's respective top 10 most similar nodes. The spectra in the network were then searched against GNPS' spectral libraries. The library's spectra were filtered in the same manner as the input data. All matches kept between network spectra, and the library's spectra were required to have a cosine score above 0.6 and at least 4 matched peaks. Analog search was enabled against the library with a maximum mass shift of 100.0 Da. Running times were under 10 minutes. The following list details all molecular networking parameters and their values used to generate the molecular networks used in the manuscript.

1. PAIRS\_MIN\_COSINE=0.55
2. ANALOG\_SEARCH=1
3. tolerance.PM\_tolerance=0.25
4. tolerance.Ion\_tolerance=0.005
5. MIN\_MATCHED\_PEAKE=2
6. TOPK=10
7. CLUSTER\_MIN\_SIZE=2
8. MAXIMUM\_COMPONENT\_SIZE=120/100\*
9. MIN\_PEAK\_INT=500.0
10. FILTER\_STDDEV\_PEAK\_INT=2.0
11. RUN\_MSCLUSTER=On
12. FILTER\_PRECURSOR\_WINDOW=0
13. FILTER\_LIBRARY=1
14. WINDOW\_FILTER=0
15. SCORE\_THRESHOLD=0.6
16. MIN\_MATCHED\_PEAKE\_SEARCH=4
17. MAX\_SHIFT\_MASS=100.0

For the MAXIMUM\_COMPONENT\_SIZE parameter, 120 was used for the positive ionization mode, and 100 for the negative ionization mode. These values were determined by starting at 80 and increase in steps of 20 till the largest network was smaller than the maximum component size.

Cytoscape, network visualization software, was used to further process and visualize the downloaded molecular network data. The recommended graphical layout style is FM3 which is available for Cytoscape versions 2.8.1 and below. Thus, the molecular network was uploaded into Cytoscape (version 2.8.1) following the

documentation available on the GNPS website. After applying the FM3 layout plugin, the molecular network was saved in .cys format (Cytoscape Session File) and reopened in Cytoscape version 3.2.0, where labelling and colouring of nodes and edges was conducted. Most importantly, the nodes were labelled with precursor masses, coloured using the rainbow pallet (two nodes having the same colour means that they are present in the same set of files, and accordingly, two nodes having similar colours means that they are present in a similar set of files, often differing in one or two files), and the size of the nodes was made proportional to the number of unique files from where the node spectra originated, i.e., the larger the node, the more unique files its spectra came from. The edges were labelled with the cosine similarity score of the two nodes they connect. The resulting molecular networks for both ionization modes were then inspected in the Cytoscape environment (see also (13)).

## MS2LDA and Molecular Networking Comparison

Inspection of other clusters produced by Molecular Networking allowed us to identify clusters based on the core structures for histidine, tyrosine and tyramine (ethylphenol), as well as hydroxycinnamic acid, guanine and citric acid, in positive and negative ionization mode respectively. After a more detailed analysis of the Mass2Motifs related to ferulic acid, histidine, tyrosine, and tryptophan, we could annotate ferulic acid conjugates to polyamine structures like putrescine, histidine metabolites conjugated to hexose and organic acid moieties as well as a family of indole (tryptophan) related metabolites (see Supporting Information section 5.6 for more details). Two of those annotated beer metabolites were found to be dipeptides, whereas all others represent amino acids conjugated with other compound classes.

Based on the example shown in Figure 4 of the paper, it is likely that annotations of many molecules in these clusters could benefit from the flexibility of better decomposition of the spectra into multiple Mass2Motifs, rather than each parent ion having to be assigned to a single cluster alone. To illustrate with an example, we see in Figure S-15 a matrix of cosine similarities of some parent ions drawn from the ferulic acid based cluster and the tyramine based cluster constructed through molecular networking. We see clear, distinct groupings of these spectra into two clusters based on the parent ions' cosine similarities. Members of each cluster can therefore be explained by a single Mass2Motif (the ferulic acid cluster by M2M\_19, and the tyramine cluster by M2M\_58). However, one parent ion can also be explained by the two Mass2Motifs together. In cosine clustering, this parent ion would have to go into one cluster or the other based on its cosine similarity.

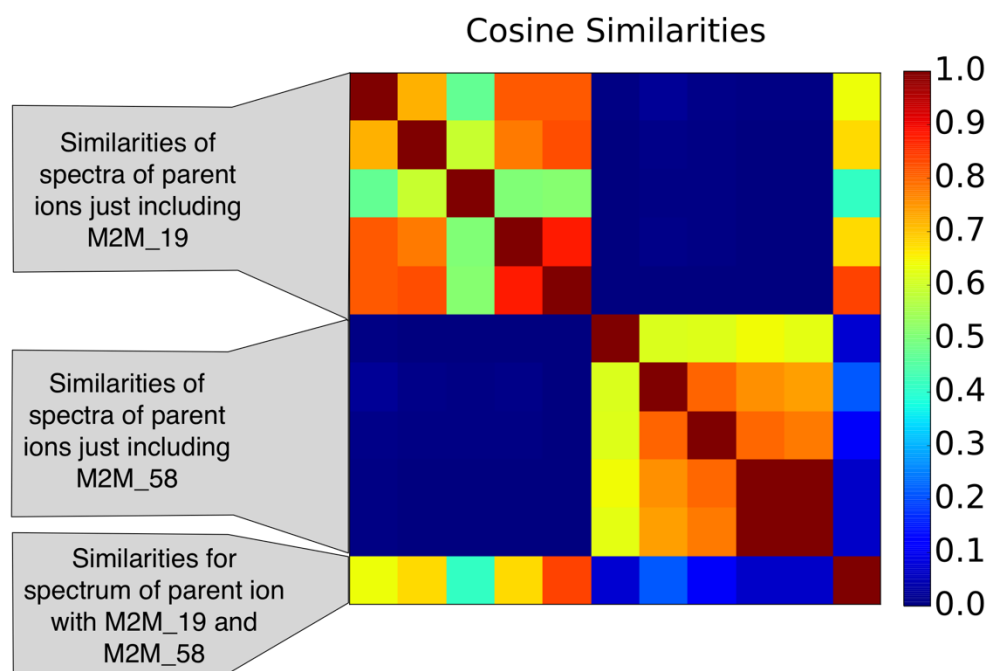

Figure S-15. Cosine clustering results of spectra drawn from the ferulic acid based cluster and the tyramine based cluster. The last row represents the spectrum containing both substructures, and is connected to one of the clustered based on cosine similarity scoring.

## S2.10 Perplexity Comparison of MS2LDA and Multinomial Mixture Model

To validate the assumption of Mass2Motifs representing biological building blocks (i.e. fragmentation spectrum contains more than one Mass2Motifs), we compared the LDA model at the heart of the MS2LDA workflow to a multinomial mixture model that can be used for the clustering of fragmentation spectra (like Molecular Networking). The latter is equivalent to LDA with each spectrum being forced to consist of only one Mass2Motif. If MS2LDA is indeed finding structural features as conserved patterns of fragments and losses, it should explain the data with fewer Mass2Motifs than the mixture model. This is because the mixture model has to create separate Mass2Motifs for all observed combinations of structural features.

For model comparison, we plot perplexity (a measure of model fit; lower values indicate a better fit) for the two models as a function of  $K$ , the number of Mass2Motifs (for LDA) or clusters (for the mixture model). This is shown in Figure S-16. The lower perplexity values for  $K > 100$  demonstrates that LDA provides a better model fit on the held-out data when compared to the mixture model, thus validating our assumption that allowing multiple conserved blocks to be present in small molecule fragmentation data is a better representation of the biochemical properties of the fragmented molecules. Details of the mixture models and on hyper-parameter optimizations and the cross-validation procedures of the two models are available in Section S1.2.

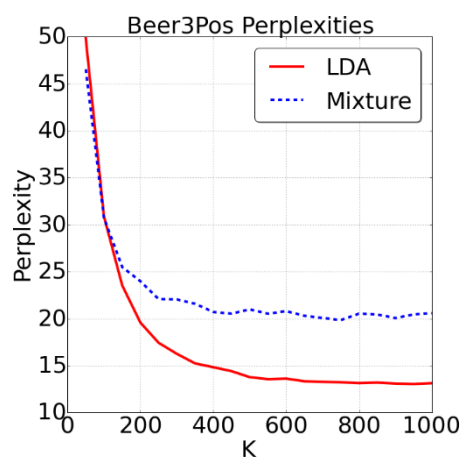

Figure S-16. Results of model comparisons of LDA and multinomial mixture model on the beer3 positive ionization mode dataset. The lower perplexity values for  $K > 100$  demonstrates that LDA provides a better model fit on the held-out data when compared to the mixture model.

## S2.11 Differential Analysis of Mass2Motifs

By linking the MS2LDA analysis with fold changes of MS1 peaks, we can assess the DE of Mass2Motifs, allowing us to identify biochemical changes across groups of samples based on which metabolites can be explained by a Mass2Motif. The advantage of this approach is for the purpose of differential analysis, there can be more fragmentation spectra explainable by the MassMotifs in comparison to the number of spectra that can be annotated/identified through conventional means (see Discussion in the paper). This can be very useful, for example, in the case of a pathway-related Mass2Motif where we can assess the change in pathway activity across groups of samples without first having to identify and map molecules to the pathway.

For every Beer extract, LC-MS runs were processed using an in-house metabolomics pipeline (based on XCMS (1) and mzMatch(14)). Peak tables were exported to .csv files, and the linking of MS1 peaks in the MS2LDA analysis to the MS1 peaks in the exported peak tables was performed through a greedy matching scheme. For each MS1 peak in MS2LDA, we find its corresponding MS1 peak in the exported peak table within a specified

mass and RT tolerance values (3 ppm, 30 seconds). If there are multiple possible matches, the one with the nearest m/z difference is selected. Following this, for each Mass2Motif, we construct a matrix where each row is a linked MS1 peak that can be explained by that Mass2Motif and the columns are intensity values from the different case/control groups. This matrix is used as input to our implementation of PLAGE (15), the output of which are the PLAGE scores of differentially expressed Mass2Motifs.

Figure S-17 shows four examples of Mass2Motifs with high PLAGE scores, which we have annotated as related to guanine, tryptophan, tyrosine and pentose loss substructures (details on their MS1 peak annotations are in Table S-18). Comparing against spectral similarity clustering, the molecules explainable by the pentose Mass2Motif (Figure S-17D) are distributed over 10 spectral clusters. Similarly, the 9 tryptophan (indole) related metabolites (many of which are considerably more abundant in Beer 2 than Beer 3) that can be explained by the tryptophan Mass2Motif (Figure S-17B) were distributed over 7 spectral clusters.

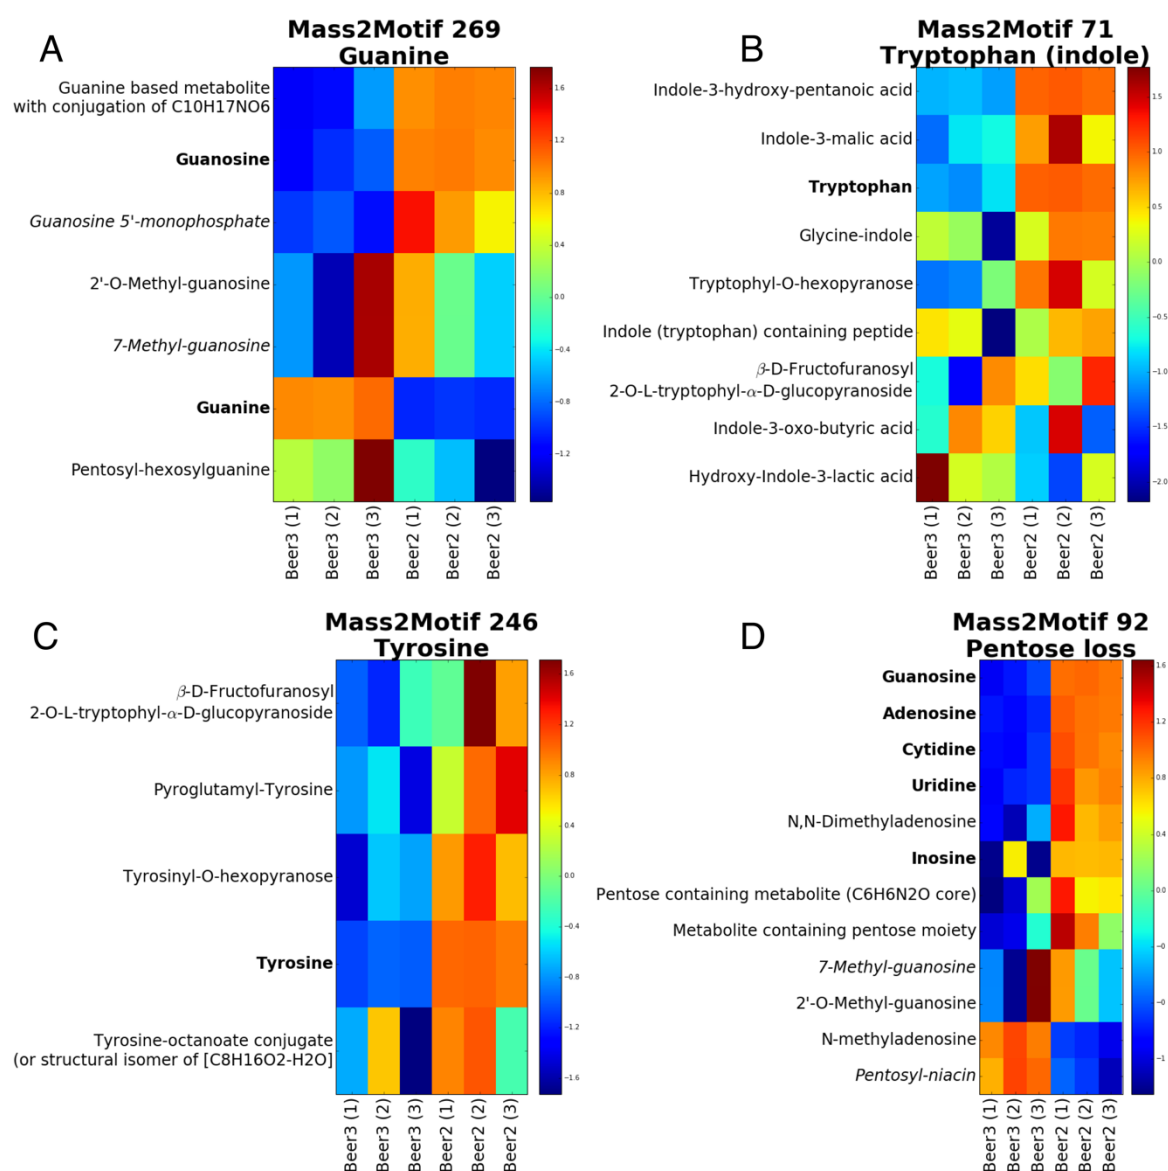

Figure S-17: Log fold change heat-maps for the A) guanine, B) tryptophan, C) tyrosine and D) pentose loss Mass2Motifs. Each row is an annotated MS1 peak and columns represent samples. For this validation, Metabolite identification was performed manually based on the Metabolite Standard Initiative Metabolite Identification scheme. Bold labels indicate identification at the highest level of confidence (1), while italic labels indicate identification at the next level of confidence (2). The remainder are level (3) or (4).

Table S-18. Annotation details on all MS1 peaks that can be explained by the four differentially-expressed Mass2Motifs in Figure S-17. All metabolites were annotated and validated from the Beer2 positive mode ionization data.

| Mass [M+H] <sup>+</sup> | EF [M+H] <sup>+</sup><br>(most likely) | RT (s)         | Class                              | Annotation                                                            | MSI MI level           |
|-------------------------|----------------------------------------|----------------|------------------------------------|-----------------------------------------------------------------------|------------------------|
| 364.0651                | C10H15N5O8P                            | 625            | Guanine                            | Guanosine 5'-monophosphate                                            | 2<br>(Nist; MassBank)  |
| <del>567.1912</del>     | <del>Artefact</del>                    | <del>582</del> | <del>Guanine</del>                 | <del>Ion product of<br/>284.0988</del>                                | -                      |
| 284.0988                | C10H15N5O5                             | 583            | Guanine                            | Guanosine                                                             | 1<br>(Nist; MassBank)  |
| 399.1623                | C15H23N6O7                             | 579            | Guanine                            | Guanine based metabolite with conjugation of C10H17NO6                | 3                      |
| 298.1146                | C11H16N5O5                             | 485            | Guanine                            | 2'-O-Methyl-guanosine                                                 | 3<br>(mzCloud)         |
| 298.1146                | C11H16N5O5                             | 497            | Guanine                            | 7-Methyl-guanosine                                                    | 2<br>(Nist; mzCloud)   |
| 152.0569                | C5H6N5O                                | 583            | Guanine                            | Guanine                                                               | 1<br>(Nist + standard) |
| 446.1514                | C16H24N5O10                            | 675            | Guanine                            | Pentosyl-hexosylguanine                                               | 3                      |
| 205.0972                | C11H13N2O2                             | 554            | Tryptophan<br>(indole)             | Tryptophan                                                            | 1                      |
| <del>205.1183</del>     | <del>C8H11N2O4</del>                   | <del>597</del> | <del>Tryptophan<br/>(indole)</del> | <del>Co-fragmentation with Tryptophan</del>                           | -                      |
| 236.0916                | C12H14NO4                              | 399            | Tryptophan<br>(indole)             | Hydroxy-Indole-3-lactic acid                                          | 3                      |
| 425.1916                | C21H25N6O4                             | 298            | Tryptophan<br>(indole)             | Indole (tryptophan) containing peptide? Co-fragmentation with isobars | 4                      |
| 217.0971                | C12H13N2O2                             | 522            | Tryptophan<br>(indole)             | Glycine-indole? – Indole containing metabolite                        | 4                      |
| 218.0811                | C12H12NO3                              | 364            | Tryptophan<br>(indole)             | Indole-3-oxo-butyric acid                                             | 3                      |
| 367.1500                | C17H23N2O7                             | 504            | Tryptophan<br>(indole)             | Tryptophyl-O-hexopyranose                                             | 3                      |
| 236.1281                | C13H18NO3                              | 270            | Tryptophan<br>(indole)             | Indole-3-hydroxy- pentanoic acid                                      | 3                      |
| 252.0864                | C10H12N4O4                             | 414            | Tryptophan<br>(indole)             | Indole-3-malic acid                                                   | 3                      |



|          |                       |     |                                |                                                                                                                            |                       |
|----------|-----------------------|-----|--------------------------------|----------------------------------------------------------------------------------------------------------------------------|-----------------------|
| 529.2027 | C23H33N2O12           | 546 | Tryptophan (indole)            | $\beta$ -D-Fructofuranosyl 2-O-L-tryptophyl- $\alpha$ -D-glucopyranoside                                                   | 3                     |
| 262.1396 | <del>C10H20N3O5</del> | 487 | <del>Tryptophan (indole)</del> | <del>co fragmentation with isobar containing indole</del>                                                                  | -                     |
| 409.1869 | Artefact              | 553 | Tryptophan (indole)            | Ion product of 205.1183                                                                                                    | -                     |
| 293.1131 | C14H17N2O5            | 431 | Tyrosine                       | Pyroglutamyl-Tyrosine                                                                                                      | 3                     |
| 182.0812 | C9H12NO3              | 585 | Tyrosine                       | Tyrosine                                                                                                                   | 1                     |
| 308.1856 | C17H26NO4             | 234 | Tyrosine                       | Tyrosine-octanoate conjugate (or structural isomer of [C8H16O2-H2O])                                                       | 3                     |
| 182.0812 | Artefact              | 610 | Tyrosine                       | Shoulder peak of 182.0812                                                                                                  | -                     |
| 194.0811 | <del>C10H12NO3</del>  | 362 | <del>Tyrosine</del>            | <del>Noisy peak not Tyrosine related (two fragments overlap) or fragment metabolite containing Tyrosine substructure</del> | -                     |
| 239.1123 | -                     | 509 | Tyrosine                       | Co fragmentation with isobars                                                                                              | -                     |
| 506.1873 | C21H32NO13            | 571 | Tyrosine                       | $\beta$ -D-Fructofuranosyl 2-O-L-tyrosinyl- $\alpha$ -D-glucopyranoside                                                    | 3                     |
| 344.1339 | C15H22NO8             | 536 | Tyrosine                       | Tyrosinyl-O-hexopyranose                                                                                                   | 3                     |
| 378.1160 | <del>C15H22O11</del>  | 592 | <del>Tyrosine</del>            | <del>Not tyrosine related some fragments overlap</del>                                                                     | -                     |
| 279.1547 | <del>C11H23N2O6</del> | 412 | <del>Tyrosine</del>            | <del>Not tyrosine related some fragments overlap</del>                                                                     | -                     |
| 268.1039 | C10H14N5O4            | 469 | Pentose loss                   | Adenosine                                                                                                                  | 1                     |
| 284.0988 | C10H15N5O5            | 583 | Pentose loss                   | Guanosine                                                                                                                  | 1<br>(Nist; MassBank) |
| 269.0879 | C10H13N4O5            | 523 | Pentose loss                   | Inosine                                                                                                                    | 1                     |
| 298.1146 | C11H16N5O5            | 485 | Pentose loss                   | 2'-O-Methyl-guanosine<br>(146.0723 loss is also part of Mass2Motif)                                                        | 3<br>(mzCloud)        |
| 298.1146 | C11H16N5O5            | 497 | Pentose loss                   | 7-Methyl-guanosine                                                                                                         | 2<br>(Nist; mzCloud)  |
| 446.1514 | C16H24N5O10           | 675 | Pentose loss                   | Pentosyl-hexosylguanine                                                                                                    | 3                     |
| 282.1190 | C11H16N5O4            | 675 | Pentose loss                   | N-methyladenosine                                                                                                          | 3                     |

|          |             |      |              |                                              |                                     |
|----------|-------------|------|--------------|----------------------------------------------|-------------------------------------|
|          |             |      | loss         |                                              |                                     |
| 390.1520 | C13H29NO10P | 622  | Pentose loss | Metabolite containing pentose moiety         | 4                                   |
| 244.0926 | C9H14N3O5   | 558  | Pentose loss | Cytidine                                     | 1                                   |
| 245.0767 | C9H13N2O6   | 499  | Pentose loss | Uridine                                      | 1                                   |
| 255.0973 | C11H15N2O5  | 1070 | Pentose loss | Pentose containing metabolite (C6H6N2O core) | 3                                   |
| 256.0814 | C11H14NO6   | 583  | Pentose loss | Pentosyl-niacin                              | 2<br>(mzCloud for niacin fragments) |
| 296.1353 | C12H18N5O4  | 405  | Pentose loss | N,N-Dimethyladenosine                        | 2                                   |

## S2.12 MS2LDA Uses High-Resolution Mass Spectrometry Information in the MS2 Domain

High-resolution mass spectrometry results in accurate mass measurements, also of detected mass fragments in the smaller  $m/z$  range of 50 – 70 Da. While it is generally true that fragments below 70 Da are found in more different annotated motifs than those above 70 Da, we could observe 19 different fragments with a nominal mass of 70 or lower. In 6 cases, two of those fragments have the same nominal mass, and in 1 case even three fragments share the same nominal mass: 60.0448 (C2H6NO, [M+H]<sup>+</sup>), 60.0559 (CH6N3, [M+H]<sup>+</sup>), and 60.0810 (C3H10N, [M+H]<sup>+</sup>). This shows the importance of using accurate mass fragmentation data as input to enable distinction between those fragment sets, and other isobaric fragments of higher  $m/z$ . Some of these fragments are unique for a substructure, for example, for CH6N3 the guanidine group is the only likely formation of the atoms, especially taking biological extracts as samples into account. Others are more generic, i.e., C4H5 and C4H7, but are part of Mass2Motifs pointing to different structural features in combinations with mass fragments of higher  $m/z$ .

## S2.13 Spectral Matching of Mass2Motifs Using Their Reconstructed Mass Spectra

Table S-19 shows the results from reconstructing fragmentation spectra from various Mass2Motifs discovered through MS2LDA (see for examples Figure S-20) and using them to perform spectral matching to the NIST MSMS (Nist\_msms) and MassBank spectral databases. Reconstruction of the spectra was performed by taking into account all the fragment features above the user-defined threshold  $t_\phi$  on the Mass2Motif-to-features distributions [the  $\phi$  parameters]). Here,  $t_\phi$  is set to 0.01, which is the same value used for visualisation in MS2LDAvis. The counts of fragment features from the data that can be explained the Mass2Motif are then converted into relative intensities. This shows the potential to automatically structurally characterize Mass2Motifs.

| M2M | Database Annotations                                                                                        | EFs top hits of each database | Database                  | Score              |
|-----|-------------------------------------------------------------------------------------------------------------|-------------------------------|---------------------------|--------------------|
| 13  | <b>L-Glutamine</b>                                                                                          | C5H10N2O3                     | Nist_msms                 | 94.38              |
| 17  | <b>L-Tyrosine</b>                                                                                           | C9H11NO3                      | Nist_msms                 | 78.95              |
| 19  | <b>trans-Ferulic acid</b>                                                                                   | C10H10O4                      | Nist_msms                 | 76.94              |
| 40  | Gln-Gly-Lys                                                                                                 | C13H25N5O5                    | Nist_msms                 | 11.07              |
| 42  | <b>L-Asparagine</b>                                                                                         | C4H8N2O3                      | Nist_msms                 | 97.15              |
|     | <b>Asn</b>                                                                                                  | C4H8N2O3                      | MassBank                  | 97.15              |
| 45  | L-Lysine                                                                                                    | C6H14N2O2                     | Nist_msms                 | 71.93              |
| 55  | 4-Hydroxycinnamic acid (L-phenylalanine methyl ester) amide<br>4-Coumaric acid<br>(=4-hydroxycinnamic acid) | C19H19NO4<br><br>C9H8O3       | Nist_msms<br><br>MassBank | 50.69<br><br>11.33 |
| 58  | <b>Phenol, 4-(2-aminoethyl)</b><br>(=Tyramine)                                                              | C8H11NO                       | Nist_msms                 | 75.33              |
| 67  | <b>cis-Aconitic acid</b>                                                                                    | C6H6O6                        | Nist_msms                 | 97.4               |
| 69  | <b>D-(+)-Arabitol</b>                                                                                       | C5H12O5                       | Nist_msms                 | 40.51              |
| 79  | <b>Betaine</b>                                                                                              | C5H11NO2                      | Nist_msms                 | 98.64              |
|     | <b>Betaine</b>                                                                                              | C5H11NO2                      | MassBank                  | 98.64              |
| 82  | Guanidine, (4-aminobutyl)-                                                                                  | C5H14N4                       | Nist_msms                 | 71.18              |
| 91  | 5-Aminosalicylic acid                                                                                       | C7H7NO3                       | Nist_msms                 | 83.59              |
| 98  | 1-Aminocyclohexane-carboxylic acid<br>L-2-Aminoadipic acid                                                  | C7H13NO2<br><br>C6H11NO4      | Nist_msms<br><br>MassBank | 88.76<br><br>1.88  |
| 115 | <b>2-Amino-1-phenylethanol</b><br>(Phenylethanolamine)                                                      | C8H11NO                       | Nist_msms                 | 91.03              |

|     |                                                                                |               |           |       |
|-----|--------------------------------------------------------------------------------|---------------|-----------|-------|
| 129 | <b>Lactulose</b>                                                               | C12H22O11     | Nist_msms | 32.74 |
| 130 | Uridine                                                                        | C9H12N2O6     | MassBank  | 58.13 |
|     | L-Asparagine                                                                   | C4H8N2O3      | Nist_msms | 17.1  |
| 131 | <b>D-(+)-Cellobiose</b>                                                        | C12H22O11     | Nist_msms | 54.02 |
| 158 | Gly-Leu                                                                        | C8H16N2O3     | Nist_msms | 54.26 |
| 162 | Acyclovir<br>(acycloguanosine)                                                 | C8H11N5O3     | Nist_msms | 89.55 |
| 166 | <b>5-Methylcytosine</b>                                                        | C5H7N3O       | Nist_msms | 52.69 |
|     | <b>5-Methylcytosine</b>                                                        | C5H7N3O       | MassBank  | 52.69 |
| 174 | L-Glutamic acid                                                                | C5H10N2O3     | Nist_msms | 15.89 |
|     | N-Acetylglutamate                                                              | C7H11NO5      | MassBank  | 10.27 |
| 184 | Trimethylamine N-oxide                                                         | C3H9NO        | Nist_msms | 88.62 |
| 202 | <b>L-Tryptophan</b>                                                            | C11H12N2O2    | Nist_msms | 72.71 |
| 211 | <b>N-acetylputrescine</b>                                                      | C6H14N2O      | MassBank  | 79.53 |
|     | Guanidine, (4-aminobutyl)                                                      | C5H14N4       | Nist_msms | 18.75 |
| 220 | <b>.beta.-Nicotinamide<br/>adenine dinucleotide,<br/>reduced<br/>Adenosine</b> | C21H29N7O14P2 | Nist_msms | 16.98 |
|     |                                                                                | C10H13N5O4    | MassBank  | 8.55  |
| 222 | <b>L-Serine</b>                                                                | C3H7NO3       | Nist_msms | 95.01 |
| 226 | 15-Deoxy-.DELTA.12,14-<br>prostaglandin D2                                     | C20H30O4      | Nist_msms | 17.29 |
| 230 | L-NG-Nitroarginine methyl<br>ester                                             | C7H15N5O4     | Nist_msms | 24.84 |
| 241 | N-.alpha.-(tert-<br>Butoxycarbonyl)- <b>L-<br/>Histidine</b>                   | C11H17N3O4    | Nist_msms | 73.25 |
|     | <b>L-Histidine</b>                                                             | C6H9N3O2      | MassBank  | 15.32 |
| 276 | 2,6-Xylidine                                                                   | C8H11N        | Nist_msms | 88.45 |
| 284 | <b>1,2,3-Benzenetriol</b>                                                      | C6H6O3        | Nist_msms | 91.25 |

Table S-19. Reconstructed mass spectra from conserved patterns found in fragment-based Mass2Motifs searched in Nist and MassBank databases – top annotations for each database (if any) are indicated with their scores and highlighted in bold if they structurally matched manual annotations.

Figure S-20 shows examples of reconstructed Mass2Motifs of tyrosine (M2M\_17), ferulic acid (M2M\_19), 5-Methylcysteine (M2M\_166) and histidine (M2M\_241) related motifs. These reconstructed spectra were then used to search in the Nist\_msms and MassBank libraries.

### A) Mass2Motif 17 – Tyrosine related

Reconstructed MS2 peak list and mass spectrum:

| m/z [M+H <sup>+</sup> ] | Relative intensity |
|-------------------------|--------------------|
| 136.07599               | 100.0              |
| 182.08217               | 36.1               |
| 123.04467               | 22.7               |
| 165.05388               | 19.4               |
| 160.90206               | 18.6               |
| 119.04874               | 16.3               |
| 102.0547                | 12.7               |
| 95.04936                | 10.0               |
| 247.1084                | 8.65               |
| 161.0686                | 7.50               |
| 119.04991               | 6.93               |
| 165.05578               | 6.74               |
| 154.08575               | 6.54               |

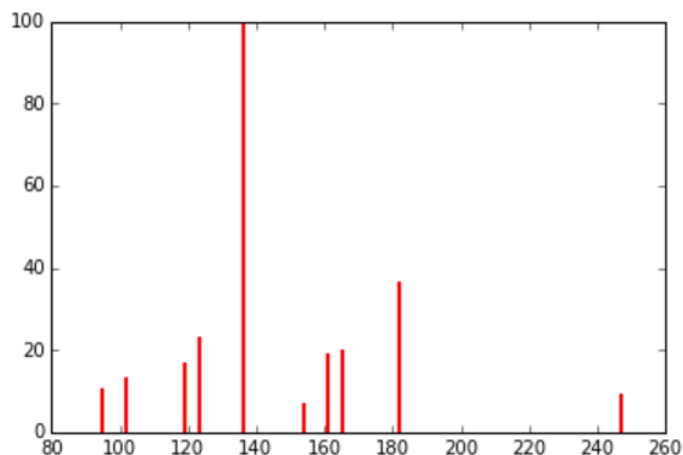

### B) Mass2Motif 19 – Ferulic acid related

Reconstructed MS2 peak list and mass spectrum:

| m/z [M+H <sup>+</sup> ] | Relative intensity |
|-------------------------|--------------------|
| 177.05475               | 100.0              |
| 89.03864                | 76.7               |
| 145.02839               | 72.1               |
| 117.03316               | 60.6               |
| 364.22203               | 18.4               |
| 149.05998               | 14.7               |
| 307.17496               | 14.4               |
| 100.07536               | 6.90               |
| 171.1487                | 6.52               |
| 134.03657               | 6.39               |
| 78.04655                | 5.89               |
| 234.11111               | 5.77               |

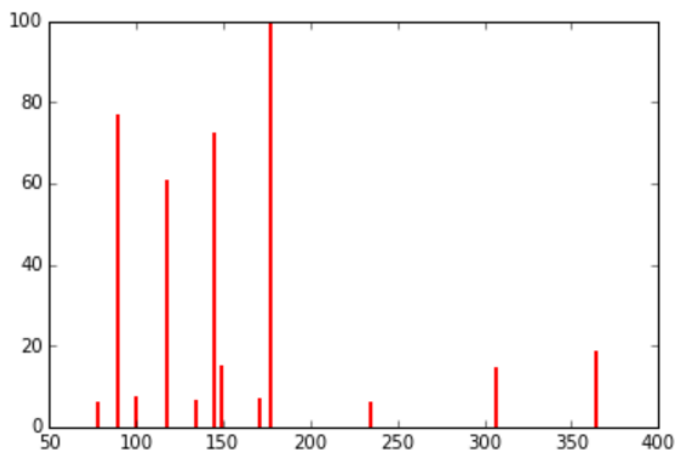

### C) Mass2Motif 166 – 5-Methylcysteine related

Reconstructed MS2 peak list and mass spectrum:

| m/z [M+H <sup>+</sup> ] | Relative intensity |
|-------------------------|--------------------|
| 126.0665                | 100.0              |
| 109.03967               | 46.1               |
| 127.03204               | 16.4               |
| 83.06041                | 9.52               |
| 186.10718               | 6.90               |
| 69.05759                | 4.77               |
| 68.04977                | 4.61               |
| 108.05597               | 4.28               |
| 81.04501                | 3.62               |

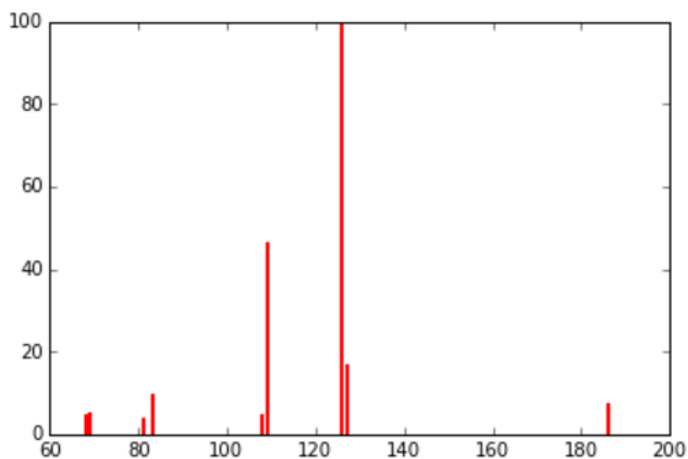

#### D) Mass2Motif 241 – Histidine related

Reconstructed MS2 peak list and mass spectrum:

| m/z [M+H <sup>+</sup> ] | Relative intensity |
|-------------------------|--------------------|
| 110.07176               | 100.0              |
| 83.06041                | 29.1               |
| 93.04509                | 18.1               |
| 156.07684               | 12.7               |
| 56.04977                | 5.88               |
| 363.17581               | 5.88               |
| 143.11757               | 4.47               |
| 81.04501                | 4.41               |
| 95.06076                | 3.23               |

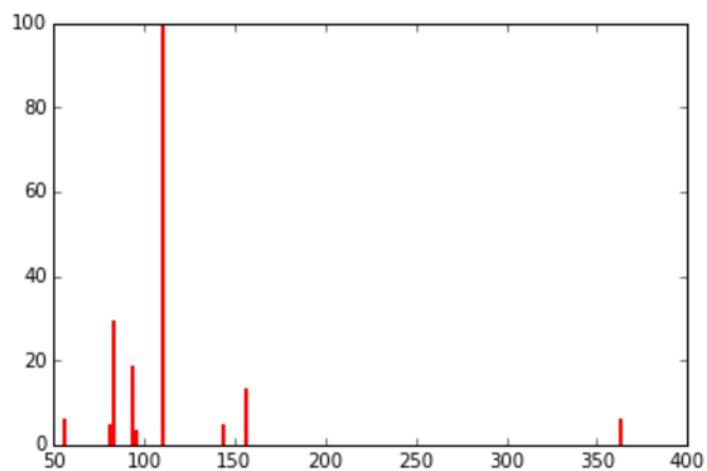

Figure S-20 Reconstructed mass spectra from Mass2Motifs found in beer data that could be used for spectral matching.

## SECTION S3. BEER SAMPLES INFORMATION

Beer samples from three commercial beers and one home-brewed beer were used as representative complex mixtures of diverse biochemical:

- Beer1 is from a home-brewed bottle of German Wheat Beer (the Beer sheet can be found in S3.1 – S3.6 below).
- Beer2 is from a bottle of ‘Jaw Glyde Ale’ (a Golden/Blond Ale; <http://www.jawbrew.co.uk>).
- Beer3 is from a bottle of ‘Seven Giraffes Extraordinary Ale’ (an IPA style beer; <http://www.williamsbrosbrew.com/beerboard/bottles/seven-giraffes>).
- Beer4 is from a bottle of ‘Black Sheep Ale’ (a Golden Bitter Ale; <https://www.blacksheepbrewery.com/beers/15/black-sheep-ale>).

### S3.1 General information

|                     |                                             |
|---------------------|---------------------------------------------|
| Type                | German Wheat Beer - Weizen/Weissbier (15 A) |
| Type                | All Grain                                   |
| Batch Size          | 19.00 l                                     |
| Boil Size           | 27.97 l                                     |
| Boil Time           | 60 min                                      |
| End of Boil Vol     | 23.70 l                                     |
| Final Bottling Vol  | 16.16 l                                     |
| Fermentation        | Ale, Single Stage                           |
| Date                | 02 Jan 2015                                 |
| Brewer              | Paul Simon                                  |
| Equipment           | Paul's Kit                                  |
| Efficiency          | 50.00 %                                     |
| Est Mash Efficiency | 60.0 %                                      |
| Taste Rating        | 30.0                                        |

### S3.2 Ingredients

| # | Name                                             | Type  | Amt       | %/IBU     |
|---|--------------------------------------------------|-------|-----------|-----------|
| 1 | White Wheat Malt (4.7 EBC)                       | Grain | 4075.88 g | 53.7%     |
| 2 | Pale Malt (2 Row) UK (5.9 EBC)                   | Grain | 3000.0 g  | 39.5 %    |
| 3 | Munich Malt (17.7 EBC)                           | Grain | 335.0 g   | 4.4%      |
| 4 | Melanoiden Malt (39.4 EBC)                       | Grain | 113.0 g   | 1.5%      |
| 5 | Caramel/Crystal Malt - 40L (78.8 EBC)            | Grain | 40.0 g    | 0.5%      |
| 6 | Chocolate Malt (689.5 EBC)                       | Grain | 28.00 g   | 0.4%      |
| 7 | Hallertauer Hersbrucker [4.00 %] - Boil 60.0 min | Hop   | 30.66 g   | 13.4 IBUs |
| 8 | Hallertauer Hersbrucker [4.00 %] - Boil 15.0 min | Hop   | 17.01 g   | 3.7 IBUs  |

### S3.3 Gravity, Alcohol Content and Color

|                           |           |
|---------------------------|-----------|
| Est Original Gravity      | 1.063 SG  |
| Est Final Gravity         | 1.016 SG  |
| Estimated Alcohol by Vol  | 6.2 %     |
| Bitterness                | 17.1 IBUs |
| Est Color                 | 17.1 EBC  |
| Measured Original Gravity | 1.070 SG  |
| Measured Final Gravity    | 1.020 SG  |
| Actual Alcohol by Vol     | 6.6 %     |

|          |              |
|----------|--------------|
| Calories | 675.7 kcal/l |
|----------|--------------|

### S3.4 Mash Profile

|                           |                              |
|---------------------------|------------------------------|
| Mash Name                 | Single Infusion, Medium Body |
| Sparge Water              | 4.69 l                       |
| Sparge Temperature        | 75.6 C                       |
| Adjust Temp for Equipment | TRUE                         |
| Total Grain Weight        | 7591.88 g                    |
| Grain Temperature         | 20.0 C                       |
| Tun Temperature           | 20.0 C                       |
| Mash PH                   | 5.20                         |

### S3.5 Mash Steps

| Name     | Description                               | Step Temperature | Step Time |
|----------|-------------------------------------------|------------------|-----------|
| Mash In  | Add 20.88 l of water at 75.5 C            | 66.7 C           | 60 min    |
| Mash Out | Add 11.09 l of water at 95.8 C            | 75.6 C           | 10 min    |
| Sparge   | Fly sparge with 4.69 l of water at 75.6 C |                  |           |

Mash Notes: Simple single infusion mash for use with most modern well modified grains (about 95% of the time).

### S3.6 Carbonation and Storage

|                          |                                  |
|--------------------------|----------------------------------|
| Carbonation Type         | Bottle                           |
| Pressure/Weight          | 110.11 g                         |
| Keg/Bottling Temperature | 21.1 C                           |
| Fermentation             | Ale, Single Stage                |
| Volumes of CO2           | 2.7                              |
| Carbonation Used         | Bottle with 110.11 g Table Sugar |
| Age for                  | 30.00 days                       |
| Storage Temperature      | 18.3 C                           |



## **SECTION S4. DATA ACQUISITION WORKFLOW**

Blank runs, quality control samples, and 3 standard mixes containing 150 reference compounds were run to assess the quality of the mass spectrometer and aid in metabolite annotation and identification (16). The pooled sample was run prior to and across the batch to monitor the stability and quality of the LC-MS run, whereas the samples were run in a randomized order. Immediately after acquisition, all .raw files were converted into MzXML format, thereby centroiding the mass spectra and separating positive and negative ionization mode spectra into two different mzXML files using the command line version of MSconvert (ProteoWizard). Fragmentation files were also converted into .mzML formats using the GUI version of MSconvert.

Accurate masses of standards were obtained well within 3 ppm accuracy and intensities of the quality control samples (a beer extract and a serum extract) were as expected. Six runs were collected for each beer sample, as well as the pooled beer sample, so that three combined full scan mode files were recorded, one combined fragmentation mode file, and two separate fragmentation mode files, one for (+) and one for (-) mode.

## **SECTION S5. MS AND MS/MS SETTINGS**

### **S5.1 Positive Negative Ionization Combined Fragmentation Mode**

A duty cycle consisted of a full scan in positive ionization mode, followed by a TopN data dependent MS/MS (MS2) fragmentation event taking the 10 most abundant ion species not on the dynamic exclusion list, followed by the same two scan events in negative ionization mode. Data acquisition was carried out in positive (+) and negative (-) switching ionization mode, using m/z 74.0964 (+) (ACN cluster), 88.07569 (+) (contaminant), and m/z 112.98563 (-) (Formic Acid cluster) as locking masses. The set up was calibrated [Thermo calmix, with additional masses at lower m/z; 74.0964 m/z (+) and 89.0244 (-)] in both ionization modes before analysis and a tune file targeted towards the lower m/z range was used.

In both ionization modes full scan (MS1) data was acquired in profile mode at 35,000 resolution using 1 microscan, an AGC target of 1E6 cts, a maximum injection time of 120 milliseconds, with spray voltages +3.8 kV (+) and -3.0 kV (-), probe heater temperature 150 °C, capillary temperature 320 °C, sheath gas flow rate 40, auxiliary gas flow rate 15 a.u., sweep gas flow rate 1 a.u, and a full scan mass window of 70–1050 m/z.

MS/MS (data dependent-MS2) data was acquired in profile mode at 35,000 resolution using 1 microscan, an AGC target of 1E5 cts, a maximum injection time of 120 milliseconds, a loop count of 10, a MSX count of 1, a TopN of 10, an isolation window of 1.0 Da, an isolation offset of 0.0 Da, a stepped normalized collision energy (NCE) higher collision dissociation (HCD) mode combining 25.2, 60.0, and 94.8 NCEs into one fragmentation scan, an undefill ratio of 20%, an intensity threshold of 1.7E5 cts, and the dynamic exclusion was set to 15 seconds. These settings result in a maximum duty cycle time (with two full scans and 20 MS2 scans) of 2.64 seconds, whilst in practice cycle times are shorter as not all 10 MS2 scans are always recorded or the ACG target was reached prior to the maximum filling time. Further settings were: no apex trigger, no charge exclusion, peptide match was off, exclude isotopes was on, and if idle, the machine did not pick up other ions.

### **S5.2 Positive or Negative Ionization Separate Fragmentation modes**

As for the combined files, with the following modifications: full scan (MS1) resolution was set to 70,000, MS/MS (MS2) resolution was set to 17,500, MS/MS maximum injection time was set to 80 milliseconds and the undefill ratio set to 10%, with a resulting intensity threshold of 1.3E5 cts. The duty cycle consisted of one full scan (MS1) event and one Top10 MS/MS (MS2) fragmentation event. These settings result in a maximum duty cycle time (with one full scan and 10 MS2 scans) of 920 milliseconds, whilst in practice cycle times are shorter as not all 10 MS2 scans are always recorded or the ACG target was reached prior to the maximum filling time.

## REFERENCES

1. Smith CA, Want EJ, O'Maille G, Abagyan R, & Siuzdak G (2006) XCMS: Processing Mass Spectrometry Data for Metabolite Profiling Using Nonlinear Peak Alignment, Matching, and Identification. *Analytical Chemistry* 78(3):779-787.
2. Stravs MA, Schymanski EL, Singer HP, & Hollender J (2013) Automatic recalibration and processing of tandem mass spectra using formula annotation. *Journal of Mass Spectrometry* 48(1):89-99.
3. Griffiths TL & Steyvers M (2004) Finding scientific topics. *Proceedings of the National Academy of Sciences* 101(suppl 1):5228-5235.
4. Wallach HM, Murray I, Salakhutdinov R, & Mimno D (2009) Evaluation methods for topic models. *Proceedings of the 26th Annual International Conference on Machine Learning* 4:1105–1112.
5. Blei DM, Ng AY, & Jordan MI (2003) Latent dirichlet allocation. *J. Mach. Learn. Res.* 3:993-1022.
6. Böcker S, Letzel MC, Lipták Z, & Pervukhin A (2009) SIRIUS: decomposing isotope patterns for metabolite identification. *Bioinformatics* 25(2):218-224.
7. Böcker S & Lipták Z (2007) A Fast and Simple Algorithm for the Money Changing Problem. *Algorithmica* 48(4):413-432.
8. Kind T & Fiehn O (2007) Seven Golden Rules for heuristic filtering of molecular formulas obtained by accurate mass spectrometry. *Bmc Bioinf.* 8:art. no. 105.
9. Sievert C & Shirley KE (2014) LDAvis: A method for visualizing and interpreting topics. *Proceedings of the Workshop on Interactive Language Learning, Visualization, and Interfaces*:63-70.
10. Horai H, *et al.* (2010) MassBank: A public repository for sharing mass spectral data for life sciences. *Journal of Mass Spectrometry* 45(7):703-714.
11. Yang JY, *et al.* (2013) Molecular Networking as a Dereplication Strategy. *Journal of Natural Products* 76(9):1686-1699.
12. Dührkop K, Shen H, Meusel M, Rousu J, & Böcker S (2015) Searching molecular structure databases with tandem mass spectra using CSI:FingerID. *Proceedings of the National Academy of Sciences* 112(41):12580-12585.
13. van der Hooft JJJ, Padmanabhan S, Burgess KEV, & Barrett MP (2016) Urinary antihypertensive drug metabolite screening using molecular networking coupled to high-resolution mass spectrometry fragmentation. *Metabolomics* 12(7):1-15.
14. Scheltema RA, Jankevics A, Jansen RC, Swertz MA, & Breitling R (2011) PeakML/mzMatch: A File Format, Java Library, R Library, and Tool-Chain for Mass Spectrometry Data Analysis. *Analytical Chemistry* 83(7):2786-2793.
15. Tomfohr J, Lu J, & Kepler TB (2005) Pathway level analysis of gene expression using singular value decomposition. *Bmc Bioinformatics* 6(1):1-11.
16. Creek DJ, *et al.* (2011) Toward Global Metabolomics Analysis with Hydrophilic Interaction Liquid Chromatography–Mass Spectrometry: Improved Metabolite Identification by Retention Time Prediction. *Analytical Chemistry* 83(22):8703-8710.
